# Supplementary material
Source: PubMed Central journal article supplement (PMC4788271)
Supplement: iven864801.ww1_default.pdf [file iven864801.ww1_default.pdf]

## Appendix: References for 300 randomly selected CRTs [posted as supplied by author]

1. Smith SA, Shah ND, Bryant SC, Christianson TJ, Bjornsen SS, Giesler PD, Krause K, Erwin PJ, Montori VM, Evidens Research Group. Chronic care model and shared care in diabetes: randomized trial of an electronic decision support system. Mayo Clinic Proceedings. 2008 [cited 2008 Jul];83(7):747-57. In: Ovid MEDLINE(R) [Internet]. <http://ovidsp.ovid.com/ovidweb.cgi?T=JS&PAGE=reference&D=medl&NEWS=N&AN=18613991>
2. Pope DS, Deluca AN, Kali P, Hausler H, Sheard C, Hoosain E, Chaudhary MA, Celentano DD, Chaisson RE. A cluster-randomized trial of provider-initiated (opt-out) HIV counseling and testing of tuberculosis patients in South Africa. Journal of Acquired Immune Deficiency Syndromes: JAIDS. 2008 [cited 2008 Jun 1];48(2):190-5. In: Ovid MEDLINE(R) [Internet]. <http://ovidsp.ovid.com/ovidweb.cgi?T=JS&PAGE=reference&D=medl&NEWS=N&AN=18520677>
3. Naylor PJ, Macdonald HM, Warburton DE, Reed KE, McKay HA. An active school model to promote physical activity in elementary schools: action schools! BC. British Journal of Sports Medicine. 2008 [cited 2008 May];42(5):338-43. In: Ovid MEDLINE(R) [Internet]. <http://ovidsp.ovid.com/ovidweb.cgi?T=JS&PAGE=reference&D=medl&NEWS=N&AN=18272538>
4. Abood DA, Black DR, Coster DC. Evaluation of a school-based teen obesity prevention minimal intervention. Journal of Nutrition Education & Behavior. 2008 [cited 2008 May-Jun];40(3):168-74. In: Ovid MEDLINE(R) [Internet]. <http://ovidsp.ovid.com/ovidweb.cgi?T=JS&PAGE=reference&D=medl&NEWS=N&AN=18457785>
5. Bouwen A, De Lepeleire J, Buntinx F. Rate of accidental falls in institutionalised older people with and without cognitive impairment halved as a result of a staff-oriented intervention. Age & Ageing. 2008 [cited 2008 May];37(3):306-10. In: Ovid MEDLINE(R) [Internet]. <http://ovidsp.ovid.com/ovidweb.cgi?T=JS&PAGE=reference&D=medl&NEWS=N&AN=18385186>
6. Althabe F, Buekens P, Bergel E, Belizan JM, Campbell MK, Moss N, Hartwell T, Wright LL, Guidelines Trial Group. A behavioral intervention to improve obstetrical care. New England Journal of Medicine. 2008 [cited 2008 May 1];358(18):1929-40. In: Ovid MEDLINE(R) [Internet]. <http://ovidsp.ovid.com/ovidweb.cgi?T=JS&PAGE=reference&D=medl&NEWS=N&AN=18450604>
7. Walters JA, Hansen EC, Johns DP, Blizzard EL, Walters EH, Wood-Baker R. A mixed methods study to compare models of spirometry delivery in primary care for patients at risk of COPD. Thorax. 2008 [cited 2008 May];63(5):408-14. In: Ovid MEDLINE(R) [Internet]. <http://ovidsp.ovid.com/ovidweb.cgi?T=JS&PAGE=reference&D=medl&NEWS=N&AN=18024537>
8. Jeyaratnam D, Whitty CJ, Phillips K, Liu D, Orezzi C, Ajoku U, French GL. Impact of rapid screening tests on acquisition of meticillin resistant Staphylococcus aureus: cluster randomised crossover trial. BMJ. 2008 [cited 2008 Apr 26];336(7650):927-30. In: Ovid MEDLINE(R) [Internet]. <http://ovidsp.ovid.com/ovidweb.cgi?T=JS&PAGE=reference&D=medl&NEWS=N&AN=18417521>
9. Pielak KL, McIntyre CC, Remple VP, Buxton JA, Skowronski DM. One arm or two? Concurrent administration of meningococcal C conjugate and hepatitis B vaccines in pre-teens. Canadian Journal of Public Health. Revue Canadienne de Sante Publique. 2008 [cited 2008 Jan-Feb];99(1):52-6. In: Ovid MEDLINE(R) [Internet]. <http://ovidsp.ovid.com/ovidweb.cgi?T=JS&PAGE=reference&D=medl&NEWS=N&AN=18435392>
10. Carter BL, Bergus GR, Dawson JD, Farris KB, Doucette WR, Chrischilles EA, Hartz AJ. A cluster randomized trial to evaluate physician/pharmacist collaboration to improve blood pressure control. Journal of Clinical Hypertension. 2008 [cited 2008 Apr];10(4):260-71. In: Ovid MEDLINE(R) [Internet]. <http://ovidsp.ovid.com/ovidweb.cgi?T=JS&PAGE=reference&D=medl&NEWS=N&AN=18401223>
11. Bourgeois FT, Simons WW, Olson K, Brownstein JS, Mandl KD. Evaluation of influenza prevention in the workplace using a personally controlled health record: randomized controlled trial. Journal of Medical Internet Research. 2008 [cited 2008];10(1):e5. In: Ovid MEDLINE(R) [Internet]. <http://ovidsp.ovid.com/ovidweb.cgi?T=JS&PAGE=reference&D=medl&NEWS=N&AN=18343794>
12. Snow M, White GL Jr, Kim HS. Inexpensive and time-efficient hand hygiene interventions increase elementary school children's hand hygiene rates. Journal of School Health. 2008 [cited 2008 Apr];78(4):230-3. In: Ovid MEDLINE(R) [Internet]. <http://ovidsp.ovid.com/ovidweb.cgi?T=JS&PAGE=reference&D=medl&NEWS=N&AN=18336683>
13. Visser SM, McCabe MP, Hudgson C, Buchanan G, Davison TE, George K. Managing behavioural symptoms of dementia: effectiveness of staff education and peer support. Aging & Mental Health. 2008 [cited 2008 Jan];12(1):47-55. In: Ovid MEDLINE(R) [Internet]. <http://ovidsp.ovid.com/ovidweb.cgi?T=JS&PAGE=reference&D=medl&NEWS=N&AN=18297478>
14. Lenhart A, Orelus N, Maskill R, Alexander N, Streit T, McCall PJ. Insecticide-treated bednets to control dengue vectors: preliminary evidence from a controlled trial in Haiti. Tropical Medicine & International Health. 2008 [cited 2008 Jan];13(1):56-67. In: Ovid MEDLINE(R) [Internet]. <http://ovidsp.ovid.com/ovidweb.cgi?T=JS&PAGE=reference&D=medl&NEWS=N&AN=18291003>
15. Melese M, Alemayehu W, Lakew T, Yi E, House J, Chidambaram JD, Zhou Z, Cevallos V, Ray K, Hong KC, Porco TC, Phan I, Zaidi A, Gaynor BD, Whitcher JP, Lietman TM. Comparison of annual and biannual mass antibiotic administration for elimination of infectious trachoma. JAMA. 2008 [cited 2008 Feb 20];299(7):778-84. In: Ovid MEDLINE(R) [Internet]. <http://ovidsp.ovid.com/ovidweb.cgi?T=JS&PAGE=reference&D=medl&NEWS=N&AN=18285589>
16. Wissow LS, Gadomski A, Roter D, Larson S, Brown J, Zachary C, Bartlett E, Horn I, Luo X, Wang MC. Improving child and parent mental health in primary care: a cluster-randomized trial of communication skills training. Pediatrics. 2008 [cited 2008 Feb];121(2):266-75. In: Ovid MEDLINE(R) [Internet]. <http://ovidsp.ovid.com/ovidweb.cgi?T=JS&PAGE=reference&D=medl&NEWS=N&AN=18245417>
17. Trost SG, Fees B, Dziewaltowski D. Feasibility and efficacy of a "move and learn" physical activity curriculum in preschool children. Journal of Physical Activity & Health. 2008 [cited 2008 Jan];5(1):88-103. In: Ovid MEDLINE(R) [Internet]. <http://ovidsp.ovid.com/ovidweb.cgi?T=JS&PAGE=reference&D=medl&NEWS=N&AN=18209256>

18. Supplementation with Multiple Micronutrients Intervention Trial (SUMMIT) Study Group, Shankar AH, Jahari AB, Sebayang SK, Aditiawarman, Apriatni M, Harefa B, Muadz H, Soesbandoro SD, Tjiong R, Fachry A, Shankar AV, Atmarita, Prihatini S, Sofia G. Effect of maternal multiple micronutrient supplementation on fetal loss and infant death in Indonesia: a double-blind cluster-randomised trial. *Lancet*. 2008 [cited 2008 Jan 19];371(9608):215-27. In: Ovid MEDLINE(R) [Internet]. <http://ovidsp.ovid.com/ovidweb.cgi?T=JS&PAGE=reference&D=medl&NEWS=N&AN=18207017>
19. Peri K, Kerse N, Robinson E, Parsons M, Parsons J, Latham N. Does functionally based activity make a difference to health status and mobility? A randomised controlled trial in residential care facilities (The Promoting Independent Living Study; PILS). *Age & Ageing*. 2008 [cited 2008 Jan];37(1):57-63. In: Ovid MEDLINE(R) [Internet]. <http://ovidsp.ovid.com/ovidweb.cgi?T=JS&PAGE=reference&D=medl&NEWS=N&AN=17965045>
20. Martinez Vizcaino V, Salcedo Aguilar F, Franquelo Gutierrez R, Solera Martinez M, Sanchez Lopez M, Serrano Martinez S, Lopez Garcia E, Rodriguez Artalejo F. Assessment of an after-school physical activity program to prevent obesity among 9- to 10-year-old children: a cluster randomized trial. *International Journal of Obesity*. 2008 [cited 2008 Jan];32(1):12-22. In: Ovid MEDLINE(R) [Internet]. <http://ovidsp.ovid.com/ovidweb.cgi?T=JS&PAGE=reference&D=medl&NEWS=N&AN=17895883>
21. O'Connor J, Seeto C, Saini B, Bosnic-Anticevich S, Krass I, Armour C, Smith L. Healthcare professional versus patient goal setting in intermittent allergic rhinitis. *Patient Education & Counseling*. 2008 [cited 2008 Jan];70(1):111-7. In: Ovid MEDLINE(R) [Internet]. <http://ovidsp.ovid.com/ovidweb.cgi?T=JS&PAGE=reference&D=medl&NEWS=N&AN=17997261>
22. Gallo JJ, Bogner HR, Morales KH, Post EP, Lin JY, Bruce ML. The effect of a primary care practice-based depression intervention on mortality in older adults: a randomized trial. *Annals of Internal Medicine*. 2007 [cited 2007 May 15];146(10):689-98. In: Ovid MEDLINE(R) [Internet]. <http://ovidsp.ovid.com/ovidweb.cgi?T=JS&PAGE=reference&D=medl&NEWS=N&AN=17502629>
23. Rosemann T, Joos S, Laux G, Gensichen J, Szecsenyi J. Case management of arthritis patients in primary care: a cluster-randomized controlled trial. *Arthritis & Rheumatism*. 2007 [cited 2007 Dec 15];57(8):1390-7. In: Ovid MEDLINE(R) [Internet]. <http://ovidsp.ovid.com/ovidweb.cgi?T=JS&PAGE=reference&D=medl&NEWS=N&AN=18050178>
24. van Agt HM, van der Stege HA, de Ridder-Sluiters H, Verhoeven LT, de Koning HJ. A cluster-randomized trial of screening for language delay in toddlers: effects on school performance and language development at age 8. *Pediatrics*. 2007 [cited 2007 Dec];120(6):1317-25. In: Ovid MEDLINE(R) [Internet]. <http://ovidsp.ovid.com/ovidweb.cgi?T=JS&PAGE=reference&D=medl&NEWS=N&AN=18055682>
25. Morriss R, Dowrick C, Salmon P, Peters S, Dunn G, Rogers A, Lewis B, Charles-Jones H, Hogg J, Clifford R, Rigby C, Gask L. Cluster randomised controlled trial of training practices in reattribution for medically unexplained symptoms. *British Journal of Psychiatry*. 2007 [cited 2007 Dec];191:536-42. In: Ovid MEDLINE(R) [Internet]. <http://ovidsp.ovid.com/ovidweb.cgi?T=JS&PAGE=reference&D=medl&NEWS=N&AN=18055958>
26. Du Moulin MF, Hamers JP, Paulus A, Berendsen CL, Halfens R. Effects of introducing a specialized nurse in the care of community-dwelling women suffering from urinary incontinence: a randomized controlled trial. *Journal of Wound, Ostomy, & Continence Nursing*. 2007 [cited 2007 Nov-Dec];34(6):631-40. In: Ovid MEDLINE(R) [Internet]. <http://ovidsp.ovid.com/ovidweb.cgi?T=JS&PAGE=reference&D=medl&NEWS=N&AN=18030102>
27. Haerens L, Deforche B, Maes L, Brug J, Vandelanotte C, De Bourdeaudhuij I. A computer-tailored dietary fat intake intervention for adolescents: results of a randomized controlled trial. *Annals of Behavioral Medicine*. 2007 [cited 2007 Nov-Dec];34(3):253-62. In: Ovid MEDLINE(R) [Internet]. <http://ovidsp.ovid.com/ovidweb.cgi?T=JS&PAGE=reference&D=medl&NEWS=N&AN=18020935>
28. Jenson JM, Dieterich WA. Effects of a skills-based prevention program on bullying and bully victimization among elementary school children. *Prevention Science*. 2007 [cited 2007 Dec];8(4):285-96. In: Ovid MEDLINE(R) [Internet]. <http://ovidsp.ovid.com/ovidweb.cgi?T=JS&PAGE=reference&D=medl&NEWS=N&AN=17968657>
29. Naughton C, Feely J, Bennett K. A clustered randomized trial of the effects of feedback using academic detailing compared to postal bulletin on prescribing of preventative cardiovascular therapy. *Family Practice*. 2007 [cited 2007 Oct];24(5):475-80. In: Ovid MEDLINE(R) [Internet]. <http://ovidsp.ovid.com/ovidweb.cgi?T=JS&PAGE=reference&D=medl&NEWS=N&AN=17670803>
30. Simpkins J, Divine G, Wang M, Holmboe E, Pladevall M, Williams LK. Improving asthma care through recertification: a cluster randomized trial. *Archives of Internal Medicine*. 2007 [cited 2007 Nov 12];167(20):2240-8. In: Ovid MEDLINE(R) [Internet]. <http://ovidsp.ovid.com/ovidweb.cgi?T=JS&PAGE=reference&D=medl&NEWS=N&AN=17998498>
31. Bruce ML, Brown EL, Raue PJ, Mlodzianowski AE, Meyers BS, Leon AC, Heo M, Byers AL, Greenberg RL, Rinder S, Katt W, Nassisi P. A randomized trial of depression assessment intervention in home health care. *Journal of the American Geriatrics Society*. 2007 [cited 2007 Nov];55(11):1793-800. In: Ovid MEDLINE(R) [Internet]. <http://ovidsp.ovid.com/ovidweb.cgi?T=JS&PAGE=reference&D=medl&NEWS=N&AN=17916119>
32. Phelan EA, Balderson B, Levine M, Erro JH, Jordan L, Grothaus L, Sandhu N, Perrault PJ, Logerfo JP, Wagner EH. Delivering effective primary care to older adults: a randomized, controlled trial of the senior resource team at group health cooperative. *Journal of the American Geriatrics Society*. 2007 [cited 2007 Nov];55(11):1748-56. In: Ovid MEDLINE(R) [Internet]. <http://ovidsp.ovid.com/ovidweb.cgi?T=JS&PAGE=reference&D=medl&NEWS=N&AN=17979898>
33. Senarath U, Fernando DN, Rodrigo I. Effect of training for care providers on practice of essential newborn care in hospitals in Sri Lanka. *JOGNN - Journal of Obstetric, Gynecologic, & Neonatal Nursing*. 2007 [cited 2007 Nov-Dec];36(6):531-41. In: Ovid MEDLINE(R) [Internet]. <http://ovidsp.ovid.com/ovidweb.cgi?T=JS&PAGE=reference&D=medl&NEWS=N&AN=17973696>

34. Pandey P, Sehgal AR, Riboud M, Levine D, Goyal M. Informing resource-poor populations and the delivery of entitled health and social services in rural India: a cluster randomized controlled trial. *JAMA*. 2007 [cited 2007 Oct 24];298(16):1867-75. In: Ovid MEDLINE(R) [Internet]. <http://ovidsp.ovid.com/ovidweb.cgi?T=JS&PAGE=reference&D=medl&NEWS=N&AN=17954538>
35. Holloway AS, Watson HE, Arthur AJ, Starr G, McFadyen AK, McIntosh J. The effect of brief interventions on alcohol consumption among heavy drinkers in a general hospital setting. *Addiction*. 2007 [cited 2007 Nov];102(11):1762-70. In: Ovid MEDLINE(R) [Internet]. <http://ovidsp.ovid.com/ovidweb.cgi?T=JS&PAGE=reference&D=medl&NEWS=N&AN=17784901>
36. Valente TW, Ritt-Olson A, Stacy A, Unger JB, Okamoto J, Sussman S. Peer acceleration: effects of a social network tailored substance abuse prevention program among high-risk adolescents. *Addiction*. 2007 [cited 2007 Nov];102(11):1804-15. In: Ovid MEDLINE(R) [Internet]. <http://ovidsp.ovid.com/ovidweb.cgi?T=JS&PAGE=reference&D=medl&NEWS=N&AN=17784893>
37. Pless IB, Hagel B, Patel H, Leduc D, Magdalinos H. Preventing product-related injuries: a randomized controlled trial of poster alerts. *Canadian Journal of Public Health. Revue Canadienne de Sante Publique*. 2007 [cited 2007 Jul-Aug];98(4):271-5. In: Ovid MEDLINE(R) [Internet]. <http://ovidsp.ovid.com/ovidweb.cgi?T=JS&PAGE=reference&D=medl&NEWS=N&AN=17896734>
38. Garg A, Butz AM, Dworkin PH, Lewis RA, Thompson RE, Serwint JR. Improving the management of family psychosocial problems at low-income children's well-child care visits: the WE CARE Project. *Pediatrics*. 2007 [cited 2007 Sep];120(3):547-58. In: Ovid MEDLINE(R) [Internet]. <http://ovidsp.ovid.com/ovidweb.cgi?T=JS&PAGE=reference&D=medl&NEWS=N&AN=17766528>
39. Robison J, Curry L, Gruman C, Porter M, Henderson CR Jr, Pillemer K. Partners in caregiving in a special care environment: cooperative communication between staff and families on dementia units. *Gerontologist*. 2007 [cited 2007 Aug];47(4):504-15. In: Ovid MEDLINE(R) [Internet]. <http://ovidsp.ovid.com/ovidweb.cgi?T=JS&PAGE=reference&D=medl&NEWS=N&AN=17766671>
40. Metlay JP, Camargo CA Jr, MacKenzie T, McCulloch C, Maselli J, Levin SK, Kersey A, Gonzales R, IMPAACT Investigators. Cluster-randomized trial to improve antibiotic use for adults with acute respiratory infections treated in emergency departments. *Annals of Emergency Medicine*. 2007 [cited 2007 Sep];50(3):221-30. In: Ovid MEDLINE(R) [Internet]. <http://ovidsp.ovid.com/ovidweb.cgi?T=JS&PAGE=reference&D=medl&NEWS=N&AN=17509729>
41. Gregson S, Adamson S, Papaya S, Mundondo J, Nyamukapa CA, Mason PR, Garnett GP, Chandiwana SK, Foster G, Anderson RM. Impact and process evaluation of integrated community and clinic-based HIV-1 control: a cluster-randomised trial in eastern Zimbabwe. *PLoS Medicine / Public Library of Science*. 2007 [cited 2007 Mar 27];4(3):e102. In: Ovid MEDLINE(R) [Internet]. <http://ovidsp.ovid.com/ovidweb.cgi?T=JS&PAGE=reference&D=medl&NEWS=N&AN=17388666>
42. Sankaranarayanan R, Esmay PO, Rajkumar R, Muwonge R, Swaminathan R, Shanthakumari S, Fayette JM, Cherian J. Effect of visual screening on cervical cancer incidence and mortality in Tamil Nadu, India: a cluster-randomised trial. *Lancet*. 2007 [cited 2007 Aug 4];370(9585):398-406. In: Ovid MEDLINE(R) [Internet]. <http://ovidsp.ovid.com/ovidweb.cgi?T=JS&PAGE=reference&D=medl&NEWS=N&AN=17679017>
43. Kiel DP, Magaziner J, Zimmerman S, Ball L, Barton BA, Brown KM, Stone JP, Dewkett D, Birge SJ. Efficacy of a hip protector to prevent hip fracture in nursing home residents: the HIP PRO randomized controlled trial. *JAMA*. 2007 [cited 2007 Jul 25];298(4):413-22. In: Ovid MEDLINE(R) [Internet]. <http://ovidsp.ovid.com/ovidweb.cgi?T=JS&PAGE=reference&D=medl&NEWS=N&AN=17652295>
44. Pitkala KH, Strandberg TE, Finne Soveri UH, Ouwehand AC, Poussa T, Salminen S. Fermented cereal with specific bifidobacteria normalizes bowel movements in elderly nursing home residents. A randomized, controlled trial. *Journal of Nutrition, Health & Aging*. 2007 [cited 2007 Jul-Aug];11(4):305-11. In: Ovid MEDLINE(R) [Internet]. <http://ovidsp.ovid.com/ovidweb.cgi?T=JS&PAGE=reference&D=medl&NEWS=N&AN=17653486>
45. Gritz ER, Tripp MK, James AS, Harrist RB, Mueller NH, Chamberlain RM, Parcel GS. Effects of a preschool staff intervention on children's sun protection: outcomes of sun protection is fun!. *Health Education & Behavior*. 2007 [cited 2007 Aug];34(4):562-77. In: Ovid MEDLINE(R) [Internet]. <http://ovidsp.ovid.com/ovidweb.cgi?T=JS&PAGE=reference&D=medl&NEWS=N&AN=16740505>
46. Sherman SE, Estrada M, Lanto AB, Farmer MM, Aldana I. Effectiveness of an on-call counselor at increasing smoking treatment. *Journal of General Internal Medicine*. 2007 [cited 2007 Aug];22(8):1125-31. In: Ovid MEDLINE(R) [Internet]. <http://ovidsp.ovid.com/ovidweb.cgi?T=JS&PAGE=reference&D=medl&NEWS=N&AN=17530311>
47. Fortney JC, Pyne JM, Edlund MJ, Williams DK, Robinson DE, Mittal D, Henderson KL. A randomized trial of telemedicine-based collaborative care for depression. *Journal of General Internal Medicine*. 2007 [cited 2007 Aug];22(8):1086-93. In: Ovid MEDLINE(R) [Internet]. <http://ovidsp.ovid.com/ovidweb.cgi?T=JS&PAGE=reference&D=medl&NEWS=N&AN=17492326>
48. Loh A, Simon D, Wills CE, Kriston L, Niebling W, Harter M. The effects of a shared decision-making intervention in primary care of depression: a cluster-randomized controlled trial. *Patient Education & Counseling*. 2007 [cited 2007 Aug];67(3):324-32. In: Ovid MEDLINE(R) [Internet]. <http://ovidsp.ovid.com/ovidweb.cgi?T=JS&PAGE=reference&D=medl&NEWS=N&AN=17509808>
49. Perria C, Mandolini D, Guerrera C, Jefferson T, Billi P, Calzini V, Fiorillo A, Grasso G, Leotta S, Marrocco W, Suraci C, Pasquarella A. Implementing a guideline for the treatment of type 2 diabetics: results of a cluster-randomized controlled trial (C-RCT). *BMC Health Services Research*. 2007 [cited 2007];779. In: Ovid MEDLINE(R) [Internet]. <http://ovidsp.ovid.com/ovidweb.cgi?T=JS&PAGE=reference&D=medl&NEWS=N&AN=17547760>
50. Daltroy LH, Phillips C, Lew R, Wright E, Shadick NA, Liang MH. A controlled trial of a novel primary prevention program for Lyme disease and other tick-borne illnesses. *Health Education & Behavior*. 2007 [cited 2007 Jun];34(3):531-42. In: Ovid MEDLINE(R) [Internet]. <http://ovidsp.ovid.com/ovidweb.cgi?T=JS&PAGE=reference&D=medl&NEWS=N&AN=17468463>

51. Bowen A, Ma H, Ou J, Billhimer W, Long T, Mintz E, Hoekstra RM, Luby S. A cluster-randomized controlled trial evaluating the effect of a handwashing-promotion program in Chinese primary schools. *American Journal of Tropical Medicine & Hygiene*. 2007 [cited 2007 Jun];76(6):1166-73. In: Ovid MEDLINE(R) [Internet]. <http://ovidsp.ovid.com/ovidweb.cgi?T=JS&PAGE=reference&D=medl&NEWS=N&AN=17556631>
52. Vaillancourt S, McGillivray D, Zhang X, Kramer MS. To clean or not to clean: effect on contamination rates in midstream urine collections in toilet-trained children. *Pediatrics*. 2007 [cited 2007 Jun];119(6):e1288-93. In: Ovid MEDLINE(R) [Internet]. <http://ovidsp.ovid.com/ovidweb.cgi?T=JS&PAGE=reference&D=medl&NEWS=N&AN=17502345>
53. Weymiller AJ, Montori VM, Jones LA, Gafni A, Guyatt GH, Bryant SC, Christianson TJ, Mullan RJ, Smith SA. Helping patients with type 2 diabetes mellitus make treatment decisions: statin choice randomized trial. *Archives of Internal Medicine*. 2007 [cited 2007 May 28];167(10):1076-82. In: Ovid MEDLINE(R) [Internet]. <http://ovidsp.ovid.com/ovidweb.cgi?T=JS&PAGE=reference&D=medl&NEWS=N&AN=17533211>
54. Howlin P, Gordon RK, Pasco G, Wade A, Charman T. The effectiveness of Picture Exchange Communication System (PECS) training for teachers of children with autism: a pragmatic, group randomised controlled trial. *Journal of Child Psychology & Psychiatry & Allied Disciplines*. 2007 [cited 2007 May];48(5):473-81. In: Ovid MEDLINE(R) [Internet]. <http://ovidsp.ovid.com/ovidweb.cgi?T=JS&PAGE=reference&D=medl&NEWS=N&AN=17501728>
55. Kovacs F, Abaira V, Santos S, Diaz E, Gestoso M, Muriel A, Gil del Real MT, Mufraggi N, Noguera J, Zamora J, Spanish Back Pain Research Network. A comparison of two short education programs for improving low back pain-related disability in the elderly: a cluster randomized controlled trial. *Spine*. 2007 [cited 2007 May 1];32(10):1053-9. In: Ovid MEDLINE(R) [Internet]. <http://ovidsp.ovid.com/ovidweb.cgi?T=JS&PAGE=reference&D=medl&NEWS=N&AN=17471084>
56. Kendrick D, Groom L, Stewart J, Watson M, Mulvaney C, Casterton R. "Risk Watch": cluster randomised controlled trial evaluating an injury prevention program. *Injury Prevention*. 2007 [cited 2007 Apr];13(2):93-8. In: Ovid MEDLINE(R) [Internet]. <http://ovidsp.ovid.com/ovidweb.cgi?T=JS&PAGE=reference&D=medl&NEWS=N&AN=17446248>
57. Curtis JR, Westfall AO, Allison J, Becker A, Melton ME, Freeman A, Kiefe CI, MacArthur M, Ockershausen T, Stewart E, Weissman N, Saag KG. Challenges in improving the quality of osteoporosis care for long-term glucocorticoid users: a prospective randomized trial. *Archives of Internal Medicine*. 2007 [cited 2007 Mar 26];167(6):591-6. In: Ovid MEDLINE(R) [Internet]. <http://ovidsp.ovid.com/ovidweb.cgi?T=JS&PAGE=reference&D=medl&NEWS=N&AN=17389291>
58. Ramseier CA, Leiggenger I, Lang NP, Bagramian RA, Inglehart MR. Short-term effects of hygiene education for preschool (kindergarten) children: a clinical study. *Oral Health & Preventive Dentistry*. 2007 [cited 2007];5(1):19-24. In: Ovid MEDLINE(R) [Internet]. <http://ovidsp.ovid.com/ovidweb.cgi?T=JS&PAGE=reference&D=medl&NEWS=N&AN=17366757>
59. Lester H, Freemantle N, Wilson S, Sorohan H, England E, Griffin C, Shankar A. Cluster randomised controlled trial of the effectiveness of primary care mental health workers. *British Journal of General Practice*. 2007 [cited 2007 Mar];57(536):196-203. In: Ovid MEDLINE(R) [Internet]. <http://ovidsp.ovid.com/ovidweb.cgi?T=JS&PAGE=reference&D=medl&NEWS=N&AN=17359606>
60. Peltola P, Vehkalahti MM, Simoila R. Effects of 11-month interventions on oral cleanliness among the long-term hospitalised elderly. *Gerodontology*. 2007 [cited 2007 Mar];24(1):14-21. In: Ovid MEDLINE(R) [Internet]. <http://ovidsp.ovid.com/ovidweb.cgi?T=JS&PAGE=reference&D=medl&NEWS=N&AN=17302926>
61. Elliot DL, Goldberg L, Kuehl KS, Moe EL, Breger RK, Pickering MA. The PHLAME (Promoting Healthy Lifestyles: Alternative Models' Effects) firefighter study: outcomes of two models of behavior change. *Journal of Occupational & Environmental Medicine*. 2007 [cited 2007 Feb];49(2):204-13. In: Ovid MEDLINE(R) [Internet]. <http://ovidsp.ovid.com/ovidweb.cgi?T=JS&PAGE=reference&D=medl&NEWS=N&AN=17293760>
62. Mangunkusumo RT, Brug J, de Koning HJ, van der Lei J, Raat H. School-based internet-tailored fruit and vegetable education combined with brief counselling increases children's awareness of intake levels. *Public Health Nutrition*. 2007 [cited 2007 Mar];10(3):273-9. In: Ovid MEDLINE(R) [Internet]. <http://ovidsp.ovid.com/ovidweb.cgi?T=JS&PAGE=reference&D=medl&NEWS=N&AN=17288625>
63. Okuyemi KS, James AS, Mayo MS, Nollen N, Catley D, Choi WS, Ahluwalia JS. Pathways to health: a cluster randomized trial of nicotine gum and motivational interviewing for smoking cessation in low-income housing. *Health Education & Behavior*. 2007 [cited 2007 Feb];34(1):43-54. In: Ovid MEDLINE(R) [Internet]. <http://ovidsp.ovid.com/ovidweb.cgi?T=JS&PAGE=reference&D=medl&NEWS=N&AN=16778147>
64. Bebb C, Kendrick D, Coupland C, Madeley R, Stewart J, Brown K, Burden R, Sturrock N. A cluster randomised controlled trial of the effect of a treatment algorithm for hypertension in patients with type 2 diabetes. *British Journal of General Practice*. 2007 [cited 2007 Feb];57(535):136-43. In: Ovid MEDLINE(R) [Internet]. <http://ovidsp.ovid.com/ovidweb.cgi?T=JS&PAGE=reference&D=medl&NEWS=N&AN=17263930>
65. Aiarzaguena JM, Grandes G, Gaminde I, Salazar A, Sanchez A, Arino J. A randomized controlled clinical trial of a psychosocial and communication intervention carried out by GPs for patients with medically unexplained symptoms. *Psychological Medicine*. 2007 [cited 2007 Feb];37(2):283-94. In: Ovid MEDLINE(R) [Internet]. <http://ovidsp.ovid.com/ovidweb.cgi?T=JS&PAGE=reference&D=medl&NEWS=N&AN=17164029>
66. Cardon GM, de Clercq DL, Geldhof EJ, Verstraete S, de Bourdeaudhuij IM. Back education in elementary schoolchildren: the effects of adding a physical activity promotion program to a back care program. *European Spine Journal*. 2007 [cited 2007



Jan];16(1):125-33. In: Ovid MEDLINE(R) [Internet].  
<http://ovidsp.ovid.com/ovidweb.cgi?T=JS&PAGE=reference&D=medl&NEWS=N&AN=16636816>

67. Moor S, Maguire A, McQueen H, Wells EJ, Elton R, Wrate R, Blair C. Improving the recognition of depression in adolescence: can we teach the teachers?. *Journal of Adolescence*. 2007 [cited 2007 Feb];30(1):81-95. In: Ovid MEDLINE(R) [Internet].  
<http://ovidsp.ovid.com/ovidweb.cgi?T=JS&PAGE=reference&D=medl&NEWS=N&AN=16500701>

68. Gans KM, Burkholder GJ Jr, Risica PM, Harrow B, Lasater TM. Cost-effectiveness of minimal contact education strategies for cholesterol change. *Ethnicity & Disease*. 2006 [cited 2006];16(2):443-51. In: Ovid MEDLINE(R) [Internet].  
<http://ovidsp.ovid.com/ovidweb.cgi?T=JS&PAGE=reference&D=med4&NEWS=N&AN=17682247>

69. Takao S, Tsutsumi A, Nishiuchi K, Mineyama S, Kawakami N. Effects of the job stress education for supervisors on psychological distress and job performance among their immediate subordinates: a supervisor-based randomized controlled trial. *Journal of Occupational Health*. 2006 [cited 2006 Nov];48(6):494-503. In: Ovid MEDLINE(R) [Internet].  
<http://ovidsp.ovid.com/ovidweb.cgi?T=JS&PAGE=reference&D=med4&NEWS=N&AN=17179643>

70. Schinke S, Di Noia J, Schwinn T, Cole K. Drug abuse risk and protective factors among black urban adolescent girls: a group-randomized trial of computer-delivered mother-daughter intervention. *Psychology of Addictive Behaviors*. 2006 [cited 2006 Dec];20(4):496-500. In: Ovid MEDLINE(R) [Internet].  
<http://ovidsp.ovid.com/ovidweb.cgi?T=JS&PAGE=reference&D=med4&NEWS=N&AN=17176186>

71. Cullen W, Stanley J, Langton D, Kelly Y, Staines A, Bury G. Hepatitis C infection among injecting drug users in general practice: a cluster randomised controlled trial of clinical guidelines' implementation. *British Journal of General Practice*. 2006 [cited 2006 Nov];56(532):848-56. In: Ovid MEDLINE(R) [Internet].  
<http://ovidsp.ovid.com/ovidweb.cgi?T=JS&PAGE=reference&D=med4&NEWS=N&AN=17132352>

72. de Jong-Potjer LC, Elsinga J, le Cessie S, van der Pal-de Bruin KM, Neven AK, Buitendijk SE, Assendelft WJ. GP-initiated preconception counselling in a randomised controlled trial does not induce anxiety. *BMC Family Practice*. 2006 [cited 2006];766. In: Ovid MEDLINE(R) [Internet]. <http://ovidsp.ovid.com/ovidweb.cgi?T=JS&PAGE=reference&D=med4&NEWS=N&AN=17083722>

73. Kelly JA, Amirkhanian YA, Kabakchieva E, Vassileva S, Vassilev B, McAuliffe TL, DiFranceisco WJ, Antonova R, Petrova E, Khoursine RA, Dimitrov B. Prevention of HIV and sexually transmitted diseases in high risk social networks of young Roma (Gypsy) men in Bulgaria: randomised controlled trial. *BMJ*. 2006 [cited 2006 Nov 25];333(7578):1098. In: Ovid MEDLINE(R) [Internet].  
<http://ovidsp.ovid.com/ovidweb.cgi?T=JS&PAGE=reference&D=med4&NEWS=N&AN=17040924>

74. Kasje WN, Denig P, Stewart RE, de Graeff PA, Haaijer-Ruskamp FM. An educational programme for peer review groups to improve treatment of chronic heart failure and diabetes mellitus type 2 in general practice. *Journal of Evaluation in Clinical Practice*. 2006 [cited 2006 Dec];12(6):613-21. In: Ovid MEDLINE(R) [Internet].  
<http://ovidsp.ovid.com/ovidweb.cgi?T=JS&PAGE=reference&D=med4&NEWS=N&AN=17100860>

75. Huizing AR, Hamers JP, Gulpers MJ, Berger MP. Short-term effects of an educational intervention on physical restraint use: a cluster randomized trial. *BMC Geriatrics*. 2006 [cited 2006];617. In: Ovid MEDLINE(R) [Internet].  
<http://ovidsp.ovid.com/ovidweb.cgi?T=JS&PAGE=reference&D=med4&NEWS=N&AN=17067376>

76. Harting J, van Assema P, van Limpt P, Gorgels T, van Ree J, Ruland E, Vermeer F, de Vries NK. Cardiovascular prevention in the Hartslag Limburg project: effects of a high-risk approach on behavioral risk factors in a general practice population. *Preventive Medicine*. 2006 [cited 2006 Nov];43(5):372-8. In: Ovid MEDLINE(R) [Internet].  
<http://ovidsp.ovid.com/ovidweb.cgi?T=JS&PAGE=reference&D=med4&NEWS=N&AN=16905181>

77. Schuster RJ, Terwoord NA, Tasosa J. Changing physician practice behavior to measure and improve clinical outcomes. *American Journal of Medical Quality*. 2006 [cited 2006 Nov-Dec];21(6):394-400. In: Ovid MEDLINE(R) [Internet].  
<http://ovidsp.ovid.com/ovidweb.cgi?T=JS&PAGE=reference&D=med4&NEWS=N&AN=17077421>

78. Haggerty KP, Fleming CB, Catalano RF, Harachi TW, Abbott RD. Raising healthy children: examining the impact of promoting healthy driving behavior within a social development intervention. *Prevention Science*. 2006 [cited 2006 Sep];7(3):257-67. In: Ovid MEDLINE(R) [Internet]. <http://ovidsp.ovid.com/ovidweb.cgi?T=JS&PAGE=reference&D=med4&NEWS=N&AN=16752099>

79. Pbert L, Osganian SK, Gorak D, Druker S, Reed G, O'Neill KM, Sheetz A. A school nurse-delivered adolescent smoking cessation intervention: a randomized controlled trial. *Preventive Medicine*. 2006 [cited 2006 Oct];43(4):312-20. In: Ovid MEDLINE(R) [Internet]. <http://ovidsp.ovid.com/ovidweb.cgi?T=JS&PAGE=reference&D=med4&NEWS=N&AN=16828858>

80. Jaycox LH, McCaffrey D, Eiseman B, Aronoff J, Shelley GA, Collins RL, Marshall GN. Impact of a school-based dating violence prevention program among Latino teens: randomized controlled effectiveness trial. *Journal of Adolescent Health*. 2006 [cited 2006 Nov];39(5):694-704. In: Ovid MEDLINE(R) [Internet].  
<http://ovidsp.ovid.com/ovidweb.cgi?T=JS&PAGE=reference&D=med4&NEWS=N&AN=17046506>

81. Feldstein AC, Smith DH, Perrin N, Yang X, Rix M, Raebel MA, Magid DJ, Simon SR, Soumerai SB. Improved therapeutic monitoring with several interventions: a randomized trial. *Archives of Internal Medicine*. 2006 [cited 2006 Sep 25];166(17):1848-54. In: Ovid MEDLINE(R) [Internet].  
<http://ovidsp.ovid.com/ovidweb.cgi?T=JS&PAGE=reference&D=med4&NEWS=N&AN=17000941>

82. Davis Martin P, Rhode PC, Dutton GR, Redmann SM, Ryan DH, Brantley PJ. A primary care weight management intervention for low-income African-American women. *Obesity*. 2006 [cited 2006 Aug];14(8):1412-20. In: Ovid MEDLINE(R) [Internet]. <http://ovidsp.ovid.com/ovidweb.cgi?T=JS&PAGE=reference&D=med4&NEWS=N&AN=16988084>
83. Hamadani JD, Huda SN, Khatun F, Grantham-McGregor SM. Psychosocial stimulation improves the development of undernourished children in rural Bangladesh. *Journal of Nutrition*. 2006 [cited 2006 Oct];136(10):2645-52. In: Ovid MEDLINE(R) [Internet]. <http://ovidsp.ovid.com/ovidweb.cgi?T=JS&PAGE=reference&D=med4&NEWS=N&AN=16988140>
84. Rubenstein LV, Meredith LS, Parker LE, Gordon NP, Hickey SC, Oken C, Lee ML. Impacts of evidence-based quality improvement on depression in primary care: a randomized experiment. *Journal of General Internal Medicine*. 2006 [cited 2006 Oct];21(10):1027-35. In: Ovid MEDLINE(R) [Internet]. <http://ovidsp.ovid.com/ovidweb.cgi?T=JS&PAGE=reference&D=med4&NEWS=N&AN=16836631>
85. Bosmans J, de Bruijne M, van Hout H, van Marwijk H, Beekman A, Bouter L, Stalman W, van Tulder M. Cost-effectiveness of a disease management program for major depression in elderly primary care patients. *Journal of General Internal Medicine*. 2006 [cited 2006 Oct];21(10):1020-6. In: Ovid MEDLINE(R) [Internet]. <http://ovidsp.ovid.com/ovidweb.cgi?T=JS&PAGE=reference&D=med4&NEWS=N&AN=16836625>
86. Rebbeck T, Maher CG, Refshauge KM. Evaluating two implementation strategies for whiplash guidelines in physiotherapy: a cluster randomised trial. *Australian Journal of Physiotherapy*. 2006 [cited 2006];52(3):165-74. In: Ovid MEDLINE(R) [Internet]. <http://ovidsp.ovid.com/ovidweb.cgi?T=JS&PAGE=reference&D=med4&NEWS=N&AN=16942451>
87. Splett PL, Erickson CD, Belseth SB, Jensen C. Evaluation and sustainability of the healthy learners asthma initiative. *Journal of School Health*. 2006 [cited 2006 Aug];76(6):276-82. In: Ovid MEDLINE(R) [Internet]. <http://ovidsp.ovid.com/ovidweb.cgi?T=JS&PAGE=reference&D=med4&NEWS=N&AN=16918855>
88. West SK, Emerson PM, Mkocho H, McHiwa W, Munoz B, Bailey R, Mabey D. Intensive insecticide spraying for fly control after mass antibiotic treatment for trachoma in a hyperendemic setting: a randomised trial. *Lancet*. 2006 [cited 2006 Aug 12];368(9535):596-600. In: Ovid MEDLINE(R) [Internet]. <http://ovidsp.ovid.com/ovidweb.cgi?T=JS&PAGE=reference&D=med4&NEWS=N&AN=16905024>
89. MacMillan HL, Wathen CN, Jamieson E, Boyle M, McNutt LA, Worster A, Lent B, Webb M, McMaster Violence Against Women Research Group. Approaches to screening for intimate partner violence in health care settings: a randomized trial. *JAMA*. 2006 [cited 2006 Aug 2];296(5):530-6. In: Ovid MEDLINE(R) [Internet]. <http://ovidsp.ovid.com/ovidweb.cgi?T=JS&PAGE=reference&D=med4&NEWS=N&AN=16882959>
90. Haerens L, Deforche B, Maes L, Stevens V, Cardon G, De Bourdeaudhuij I. Body mass effects of a physical activity and healthy food intervention in middle schools. *Obesity*. 2006 [cited 2006 May];14(5):847-54. In: Ovid MEDLINE(R) [Internet]. <http://ovidsp.ovid.com/ovidweb.cgi?T=JS&PAGE=reference&D=med4&NEWS=N&AN=16855194>
91. Leon JB, Albert JM, Gilchrist G, Kushner I, Lerner E, Mach S, Majerle A, Porter D, Ricanati E, Sperry L, Sullivan C, Zimmerer J, Sehgal AR. Improving albumin levels among hemodialysis patients: a community-based randomized controlled trial. *American Journal of Kidney Diseases*. 2006 [cited 2006 Jul];48(1):28-36. In: Ovid MEDLINE(R) [Internet]. <http://ovidsp.ovid.com/ovidweb.cgi?T=JS&PAGE=reference&D=med4&NEWS=N&AN=16797384>
92. Renzi PM, Ghezzi H, Goulet S, Dorval E, Thivierge RL. Paper stamp checklist tool enhances asthma guidelines knowledge and implementation by primary care physicians. *Canadian Respiratory Journal*. 2006 [cited 2006 May-Jun];13(4):193-7. In: Ovid MEDLINE(R) [Internet]. <http://ovidsp.ovid.com/ovidweb.cgi?T=JS&PAGE=reference&D=med4&NEWS=N&AN=16779463>
93. de Jong J, Lemmink KA, Stevens M, de Greef MH, Rispen P, King AC, Mulder T. Six-month effects of the Groningen active living model (GALM) on physical activity, health and fitness outcomes in sedentary and underactive older adults aged 55-65. *Patient Education & Counseling*. 2006 [cited 2006 Jul];62(1):132-41. In: Ovid MEDLINE(R) [Internet]. <http://ovidsp.ovid.com/ovidweb.cgi?T=JS&PAGE=reference&D=med4&NEWS=N&AN=16098704>
94. Loeb M, Carusone SC, Goeree R, Walter SD, Brazil K, Krueger P, Simor A, Moss L, Marrie T. Effect of a clinical pathway to reduce hospitalizations in nursing home residents with pneumonia: a randomized controlled trial. *JAMA*. 2006 [cited 2006 Jun 7];295(21):2503-10. In: Ovid MEDLINE(R) [Internet]. <http://ovidsp.ovid.com/ovidweb.cgi?T=JS&PAGE=reference&D=med4&NEWS=N&AN=16757722>
95. Ekstrom A, Widstrom AM, Nissen E. Does continuity of care by well-trained breastfeeding counselors improve a mother's perception of support?. *Birth*. 2006 [cited 2006 Jun];33(2):123-30. In: Ovid MEDLINE(R) [Internet]. <http://ovidsp.ovid.com/ovidweb.cgi?T=JS&PAGE=reference&D=med4&NEWS=N&AN=16732777>
96. Walker D, Gutierrez JP, Torres P, Bertozzi SM. HIV prevention in Mexican schools: prospective randomised evaluation of intervention. *BMJ*. 2006 [cited 2006 May 20];332(7551):1189-94. In: Ovid MEDLINE(R) [Internet]. <http://ovidsp.ovid.com/ovidweb.cgi?T=JS&PAGE=reference&D=med4&NEWS=N&AN=16682420>
97. Robbins LB, Gretebeck KA, Kazanis AS, Pender NJ. Girls on the move program to increase physical activity participation. *Nursing Research*. 2006 [cited 2006 May-Jun];55(3):206-16. In: Ovid MEDLINE(R) [Internet]. <http://ovidsp.ovid.com/ovidweb.cgi?T=JS&PAGE=reference&D=med4&NEWS=N&AN=16708045>
98. Cheater FM, Baker R, Reddish S, Spiers N, Wailoo A, Gillies C, Robertson N, Cawood C. Cluster randomized controlled trial of the effectiveness of audit and feedback and educational outreach on improving nursing practice and patient outcomes. *Medical*

- Care. 2006 [cited 2006 Jun];44(6):542-51. In: Ovid MEDLINE(R) [Internet].  
<http://ovidsp.ovid.com/ovidweb.cgi?T=JS&PAGE=reference&D=med4&NEWS=N&AN=16708003>
99. Vicary JR, Smith EA, Swisher JD, Hopkins AM, Elek E, Bechtel LJ, Henry KL. Results of a 3-year study of two methods of delivery of life skills training. *Health Education & Behavior*. 2006 [cited 2006 Jun];33(3):325-39. In: Ovid MEDLINE(R) [Internet].  
<http://ovidsp.ovid.com/ovidweb.cgi?T=JS&PAGE=reference&D=med4&NEWS=N&AN=16699123>
100. Callahan CM, Boustani MA, Unverzagt FW, Austrom MG, Damush TM, Perkins AJ, Fultz BA, Hui SL, Counsell SR, Hendrie HC. Effectiveness of collaborative care for older adults with Alzheimer disease in primary care: a randomized controlled trial. *JAMA*. 2006 [cited 2006 May 10];295(18):2148-57. In: Ovid MEDLINE(R) [Internet].  
<http://ovidsp.ovid.com/ovidweb.cgi?T=JS&PAGE=reference&D=med4&NEWS=N&AN=16684985>
101. Mohammadi E, Abedi HA, Jalali F, Gofranipour F, Kazemnejad A. Evaluation of 'partnership care model' in the control of hypertension. *International Journal of Nursing Practice*. 2006 [cited 2006 Jun];12(3):153-9. In: Ovid MEDLINE(R) [Internet].  
<http://ovidsp.ovid.com/ovidweb.cgi?T=JS&PAGE=reference&D=med4&NEWS=N&AN=16674782>
102. Brody GH, Murry VM, Kogan SM, Gerrard M, Gibbons FX, Molgaard V, Brown AC, Anderson T, Chen YF, Luo Z, Wills TA. The Strong African American Families Program: a cluster-randomized prevention trial of long-term effects and a mediational model. *Journal of Consulting & Clinical Psychology*. 2006 [cited 2006 Apr];74(2):356-66. In: Ovid MEDLINE(R) [Internet].  
<http://ovidsp.ovid.com/ovidweb.cgi?T=JS&PAGE=reference&D=med4&NEWS=N&AN=16649880>
103. Shrestha N, Samir KC, Baltussen R, Kafle KK, Bishai D, Niessen L. Practical approach to lung health in Nepal: better prescribing and reduction of cost. *Tropical Medicine & International Health*. 2006 [cited 2006 May];11(5):765-72. In: Ovid MEDLINE(R) [Internet]. <http://ovidsp.ovid.com/ovidweb.cgi?T=JS&PAGE=reference&D=med4&NEWS=N&AN=16640631>
104. Thompson B, Coronado G, Chen L, Islas I. Celebremos la salud! a community randomized trial of cancer prevention (United States). *Cancer Causes & Control*. 2006 [cited 2006 Jun];17(5):733-46. In: Ovid MEDLINE(R) [Internet].  
<http://ovidsp.ovid.com/ovidweb.cgi?T=JS&PAGE=reference&D=med4&NEWS=N&AN=16633921>
105. Bauchner H, Marchant CD, Bisbee A, Heeren T, Wang B, McCabe M, Pelton S, Boston-Based Pediatric Research Group. Effectiveness of Centers for Disease Control and Prevention recommendations for outcomes of acute otitis media. *Pediatrics*. 2006 [cited 2006 Apr];117(4):1009-17. In: Ovid MEDLINE(R) [Internet].  
<http://ovidsp.ovid.com/ovidweb.cgi?T=JS&PAGE=reference&D=med4&NEWS=N&AN=16585294>
106. Fossey J, Ballard C, Juszczak E, James I, Alder N, Jacoby R, Howard R. Effect of enhanced psychosocial care on antipsychotic use in nursing home residents with severe dementia: cluster randomised trial. *BMJ*. 2006 [cited 2006 Apr 1];332(7544):756-61. In: Ovid MEDLINE(R) [Internet]. <http://ovidsp.ovid.com/ovidweb.cgi?T=JS&PAGE=reference&D=med4&NEWS=N&AN=16543297>
107. Downs M, Turner S, Bryans M, Wilcock J, Keady J, Levin E, O'Carroll R, Howie K, Iliffe S. Effectiveness of educational interventions in improving detection and management of dementia in primary care: cluster randomised controlled study. *BMJ*. 2006 [cited 2006 Mar 25];332(7543):692-6. In: Ovid MEDLINE(R) [Internet].  
<http://ovidsp.ovid.com/ovidweb.cgi?T=JS&PAGE=reference&D=med4&NEWS=N&AN=16565124>
108. Mullany LC, Darmstadt GL, Khatri SK, Katz J, LeClerq SC, Shrestha S, Adhikari R, Tielsch JM. Topical applications of chlorhexidine to the umbilical cord for prevention of omphalitis and neonatal mortality in southern Nepal: a community-based, cluster-randomised trial. *Lancet*. 2006 [cited 2006 Mar 18];367(9514):910-8. In: Ovid MEDLINE(R) [Internet].  
<http://ovidsp.ovid.com/ovidweb.cgi?T=JS&PAGE=reference&D=med4&NEWS=N&AN=16546539>
109. Newell JN, Baral SC, Pande SB, Bam DS, Malla P. Family-member DOTS and community DOTS for tuberculosis control in Nepal: cluster-randomised controlled trial. *Lancet*. 2006 [cited 2006 Mar 18];367(9514):903-9. In: Ovid MEDLINE(R) [Internet].  
<http://ovidsp.ovid.com/ovidweb.cgi?T=JS&PAGE=reference&D=med4&NEWS=N&AN=16546538>
110. Dormandy E, Michie S, Hooper R, Marteau TM. Informed choice in antenatal Down syndrome screening: a cluster-randomised trial of combined versus separate visit testing. *Patient Education & Counseling*. 2006 [cited 2006 Apr];61(1):56-64. In: Ovid MEDLINE(R) [Internet]. <http://ovidsp.ovid.com/ovidweb.cgi?T=JS&PAGE=reference&D=med4&NEWS=N&AN=16533677>
111. Ziemer DC, Doyle JP, Barnes CS, Branch WT Jr, Cook CB, El-Kebbi IM, Gallina DL, Kolm P, Rhee MK, Phillips LS. An intervention to overcome clinical inertia and improve diabetes mellitus control in a primary care setting: Improving Primary Care of African Americans with Diabetes (IPCAAD) 8. *Archives of Internal Medicine*. 2006 [cited 2006 Mar 13];166(5):507-13. In: Ovid MEDLINE(R) [Internet]. <http://ovidsp.ovid.com/ovidweb.cgi?T=JS&PAGE=reference&D=med4&NEWS=N&AN=16534036>
112. Kawakami N, Takao S, Kobayashi Y, Tsutsumi A. Effects of web-based supervisor training on job stressors and psychological distress among workers: a workplace-based randomized controlled trial. *Journal of Occupational Health*. 2006 [cited 2006 Jan];48(1):28-34. In: Ovid MEDLINE(R) [Internet].  
<http://ovidsp.ovid.com/ovidweb.cgi?T=JS&PAGE=reference&D=med4&NEWS=N&AN=16484760>
113. Vrijens B, Belmans A, Matthys K, de Klerk E, Lesaffre E. Effect of intervention through a pharmaceutical care program on patient adherence with prescribed once-daily atorvastatin. *Pharmacoepidemiology & Drug Safety*. 2006 [cited 2006 Feb];15(2):115-21. In: Ovid MEDLINE(R) [Internet].  
<http://ovidsp.ovid.com/ovidweb.cgi?T=JS&PAGE=reference&D=med4&NEWS=N&AN=16342302>
114. Lang E, Afilalo M, Vandal AC, Boivin JF, Xue X, Colacone A, Leger R, Shrier I, Rosenthal S. Impact of an electronic link between the emergency department and family physicians: a randomized controlled trial. *CMAJ Canadian Medical Association Journal*. 2006

- [cited 2006 Jan 31];174(3):313-8. In: Ovid MEDLINE(R) [Internet].  
<http://ovidsp.ovid.com/ovidweb.cgi?T=JS&PAGE=reference&D=med4&NEWS=N&AN=16399880>
115. Bartholomew JB, Jowers EM. Increasing frequency of lower-fat entrees offered at school lunch: an environmental change strategy to increase healthful selections. *Journal of the American Dietetic Association*. 2006 [cited 2006 Feb];106(2):248-52. In: Ovid MEDLINE(R) [Internet]. <http://ovidsp.ovid.com/ovidweb.cgi?T=JS&PAGE=reference&D=med4&NEWS=N&AN=16442873>
116. Vazir S, Nagalla B, Thangiah V, Kamasamudram V, Bhattiprolu S. Effect of micronutrient supplement on health and nutritional status of schoolchildren: mental function. *Nutrition*. 2006 [cited 2006 Jan];22(1 Suppl):S26-32. In: Ovid MEDLINE(R) [Internet]. <http://ovidsp.ovid.com/ovidweb.cgi?T=JS&PAGE=reference&D=med4&NEWS=N&AN=16426960>
117. Stanton B, Harris C, Cottrell L, Li X, Gibson C, Guo J, Pack R, Galbraith J, Pendleton S, Wu Y, Burns J, Cole M, Marshall S. Trial of an urban adolescent sexual risk-reduction intervention for rural youth: a promising but imperfect fit. *Journal of Adolescent Health*. 2006 [cited 2006 Jan];38(1):55. In: Ovid MEDLINE(R) [Internet]. <http://ovidsp.ovid.com/ovidweb.cgi?T=JS&PAGE=reference&D=med4&NEWS=N&AN=16387250>
118. Mygind K, Borg V, Flyvholm MA, Sell L, Jepsen KF. A study of the implementation process of an intervention to prevent work-related skin problems in wet-work occupations. *International Archives of Occupational & Environmental Health*. 2006 [cited 2006 Jan];79(1):66-74. In: Ovid MEDLINE(R) [Internet]. <http://ovidsp.ovid.com/ovidweb.cgi?T=JS&PAGE=reference&D=med4&NEWS=N&AN=16180017>
119. Wiefferink CH, Reijneveld SA, de Wijs J, Swagerman M, Campman D, Paulussen TG. Screening for psychosocial problems in 5-6-year olds: a randomised controlled trial of routine health assessments. *Patient Education & Counseling*. 2006 [cited 2006 Jan];60(1):57-65. In: Ovid MEDLINE(R) [Internet]. <http://ovidsp.ovid.com/ovidweb.cgi?T=JS&PAGE=reference&D=med4&NEWS=N&AN=16332471>
120. Zillich AJ, Sutherland JM, Kumbera PA, Carter BL. Hypertension outcomes through blood pressure monitoring and evaluation by pharmacists (HOME study). *Journal of General Internal Medicine*. 2005 [cited 2005 Dec];20(12):1091-6. In: Ovid MEDLINE(R) [Internet]. <http://ovidsp.ovid.com/ovidweb.cgi?T=JS&PAGE=reference&D=med4&NEWS=N&AN=16423096>
121. Rahme E, Choquette D, Beaulieu M, Bessette L, Joseph L, Toubouti Y, LeLorier J. Impact of a general practitioner educational intervention on osteoarthritis treatment in an elderly population. *American Journal of Medicine*. 2005 [cited 2005 Nov];118(11):1262-70. In: Ovid MEDLINE(R) [Internet]. <http://ovidsp.ovid.com/ovidweb.cgi?T=JS&PAGE=reference&D=med4&NEWS=N&AN=16271911>
122. Goldstein MK, Lavori P, Coleman R, Advani A, Hoffman BB. Improving adherence to guidelines for hypertension drug prescribing: cluster-randomized controlled trial of general versus patient-specific recommendations. *American Journal of Managed Care*. 2005 [cited 2005 Nov];11(11):677-85. In: Ovid MEDLINE(R) [Internet]. <http://ovidsp.ovid.com/ovidweb.cgi?T=JS&PAGE=reference&D=med4&NEWS=N&AN=16268751>
123. Van Thuy P, Berger J, Nakanishi Y, Khan NC, Lynch S, Dixon P. The use of NaFeEDTA-fortified fish sauce is an effective tool for controlling iron deficiency in women of childbearing age in rural Vietnam. *Journal of Nutrition*. 2005 [cited 2005 Nov];135(11):2596-601. In: Ovid MEDLINE(R) [Internet]. <http://ovidsp.ovid.com/ovidweb.cgi?T=JS&PAGE=reference&D=med4&NEWS=N&AN=16251617>
124. Bernstein GA, Layne AE, Egan EA, Tennison DM. School-based interventions for anxious children. *Journal of the American Academy of Child & Adolescent Psychiatry*. 2005 [cited 2005 Nov];44(11):1118-27. In: Ovid MEDLINE(R) [Internet]. <http://ovidsp.ovid.com/ovidweb.cgi?T=JS&PAGE=reference&D=med4&NEWS=N&AN=16239860>
125. van der Sanden WJ, Mettes DG, Plasschaert AJ, Grol RP, Mulder J, Verdonchot EH. Effectiveness of clinical practice guideline implementation on lower third molar management in improving clinical decision-making: a randomized controlled trial. *European Journal of Oral Sciences*. 2005 [cited 2005 Oct];113(5):349-54. In: Ovid MEDLINE(R) [Internet]. <http://ovidsp.ovid.com/ovidweb.cgi?T=JS&PAGE=reference&D=med4&NEWS=N&AN=16202020>
126. Chandramohan D, Owusu-Agyei S, Carneiro I, Awine T, Amponsa-Achiano K, Mensah N, Jaffar S, Baiden R, Hodgson A, Binka F, Greenwood B. Cluster randomised trial of intermittent preventive treatment for malaria in infants in area of high, seasonal transmission in Ghana. *BMJ*. 2005 [cited 2005 Oct 1];331(7519):727-33. In: Ovid MEDLINE(R) [Internet]. <http://ovidsp.ovid.com/ovidweb.cgi?T=JS&PAGE=reference&D=med4&NEWS=N&AN=16195288>
127. Phillips LS, Ziemer DC, Doyle JP, Barnes CS, Kolm P, Branch WT, Caudle JM, Cook CB, Dunbar VG, El-Kebbi IM, Gallina DL, Hayes RP, Miller CD, Rhee MK, Thompson DM, Watkins C. An endocrinologist-supported intervention aimed at providers improves diabetes management in a primary care site: improving primary care of African Americans with diabetes (IPCAAD) 7. *Diabetes Care*. 2005 [cited 2005 Oct];28(10):2352-60. In: Ovid MEDLINE(R) [Internet]. <http://ovidsp.ovid.com/ovidweb.cgi?T=JS&PAGE=reference&D=med4&NEWS=N&AN=16186262>
128. Clark LF, Miller KS, Nagy SS, Avery J, Roth DL, Liddon N, Mukherjee S. Adult identity mentoring: reducing sexual risk for African-American seventh grade students. *Journal of Adolescent Health*. 2005 [cited 2005 Oct];37(4):337. In: Ovid MEDLINE(R) [Internet]. <http://ovidsp.ovid.com/ovidweb.cgi?T=JS&PAGE=reference&D=med4&NEWS=N&AN=16182145>
129. Yi JK, Luong KN. Apartment-based breast cancer education program for low income Vietnamese American women. *Journal of Community Health*. 2005 [cited 2005 Oct];30(5):345-53. In: Ovid MEDLINE(R) [Internet]. <http://ovidsp.ovid.com/ovidweb.cgi?T=JS&PAGE=reference&D=med4&NEWS=N&AN=16175957>



130. Barbic D, Pater J, Brisson RJ. Comparison of mouth guard designs and concussion prevention in contact sports: a multicenter randomized controlled trial. *Clinical Journal of Sport Medicine*. 2005 [cited 2005 Sep];15(5):294-8. In: Ovid MEDLINE(R) [Internet]. <http://ovidsp.ovid.com/ovidweb.cgi?T=JS&PAGE=reference&D=med4&NEWS=N&AN=16162986>
131. Curtis JR, Olivieri J, Allison JJ, Gaffo A, Juarez L, Kovac SH, Person S, Saag KG. A group randomized trial to improve safe use of nonsteroidal anti-inflammatory drugs. *American Journal of Managed Care*. 2005 [cited 2005 Sep];11(9):537-43. In: Ovid MEDLINE(R) [Internet]. <http://ovidsp.ovid.com/ovidweb.cgi?T=JS&PAGE=reference&D=med4&NEWS=N&AN=16159043>
132. Sandora TJ, Taveras EM, Shih MC, Resnick EA, Lee GM, Ross-Degnan D, Goldmann DA. A randomized, controlled trial of a multifaceted intervention including alcohol-based hand sanitizer and hand-hygiene education to reduce illness transmission in the home. *Pediatrics*. 2005 [cited 2005 Sep];116(3):587-94. In: Ovid MEDLINE(R) [Internet]. <http://ovidsp.ovid.com/ovidweb.cgi?T=JS&PAGE=reference&D=med4&NEWS=N&AN=16140697>
133. Crump JA, Otieno PO, Slutsker L, Keswick BH, Rosen DH, Hoekstra RM, Vulule JM, Luby SP. Household based treatment of drinking water with flocculant-disinfectant for preventing diarrhoea in areas with turbid source water in rural western Kenya: cluster randomised controlled trial. *BMJ*. 2005 [cited 2005 Sep 3];331(7515):478. In: Ovid MEDLINE(R) [Internet]. <http://ovidsp.ovid.com/ovidweb.cgi?T=JS&PAGE=reference&D=med4&NEWS=N&AN=16046440>
134. Sikkema KJ, Anderson ES, Kelly JA, Winett RA, Gore-Felton C, Roffman RA, Heckman TG, Graves K, Hoffmann RG, Brondino MJ. Outcomes of a randomized, controlled community-level HIV prevention intervention for adolescents in low-income housing developments. *AIDS*. 2005 [cited 2005 Sep 23];19(14):1509-16. In: Ovid MEDLINE(R) [Internet]. <http://ovidsp.ovid.com/ovidweb.cgi?T=JS&PAGE=reference&D=med4&NEWS=N&AN=16135905>
135. Hopper CA, Munoz KD, Gruber MB, Nguyen KP. The effects of a family fitness program on the physical activity and nutrition behaviors of third-grade children. *Research Quarterly for Exercise & Sport*. 2005 [cited 2005 Jun];76(2):130-9. In: Ovid MEDLINE(R) [Internet]. <http://ovidsp.ovid.com/ovidweb.cgi?T=JS&PAGE=reference&D=med4&NEWS=N&AN=16128481>
136. Stone RA, Mor MK, Lave JR, Hough LJ, Fine MJ. Implementation of an inpatient management and discharge strategy for patients with community-acquired pneumonia. *American Journal of Managed Care*. 2005 [cited 2005 Aug];11(8):491-9. In: Ovid MEDLINE(R) [Internet]. <http://ovidsp.ovid.com/ovidweb.cgi?T=JS&PAGE=reference&D=med4&NEWS=N&AN=16095435>
137. Finch C, Braham R, McIntosh A, McCrory P, Wolfe R. Should football players wear custom fitted mouthguards? Results from a group randomised controlled trial. *Injury Prevention*. 2005 [cited 2005 Aug];11(4):242-6. In: Ovid MEDLINE(R) [Internet]. <http://ovidsp.ovid.com/ovidweb.cgi?T=JS&PAGE=reference&D=med4&NEWS=N&AN=16081755>
138. Bauer J, Buttner P, Wiecker TS, Luther H, Garbe C. Interventional study in 1,232 young German children to prevent the development of melanocytic nevi failed to change sun exposure and sun protective behavior. *International Journal of Cancer*. 2005 [cited 2005 Sep 20];116(5):755-61. In: Ovid MEDLINE(R) [Internet]. <http://ovidsp.ovid.com/ovidweb.cgi?T=JS&PAGE=reference&D=med4&NEWS=N&AN=15849749>
139. Victor CR, Triggs E, Ross F, Lord J, Axford JS. Lack of benefit of a primary care-based nurse-led education programme for people with osteoarthritis of the knee. *Clinical Rheumatology*. 2005 [cited 2005 Aug];24(4):358-64. In: Ovid MEDLINE(R) [Internet]. <http://ovidsp.ovid.com/ovidweb.cgi?T=JS&PAGE=reference&D=med4&NEWS=N&AN=15937632>
140. Sankaranarayanan R, Nene BM, Dinshaw KA, Mahe C, Jayant K, Shastri SS, Malvi SG, Chinoy R, Kelkar R, Budukh AM, Keskar V, Rajeshwarker R, Muwonge R, Kane S, Parkin DM, Chauhan MK, Desai S, Fontaniere B, Frappart L, Kothari A, Lucas E, Panse N, Osmanabad District Cervical Screening Study Group. A cluster randomized controlled trial of visual, cytology and human papillomavirus screening for cancer of the cervix in rural India. *International Journal of Cancer*. 2005 [cited 2005 Sep 10];116(4):617-23. In: Ovid MEDLINE(R) [Internet]. <http://ovidsp.ovid.com/ovidweb.cgi?T=JS&PAGE=reference&D=med4&NEWS=N&AN=15818610>
141. Jellema P, van der Windt DA, van der Horst HE, Twisk JW, Stalman WA, Bouter LM. Should treatment of (sub)acute low back pain be aimed at psychosocial prognostic factors? Cluster randomised clinical trial in general practice. *BMJ*. 2005 [cited 2005 Jul 9];331(7508):84. In: Ovid MEDLINE(R) [Internet]. <http://ovidsp.ovid.com/ovidweb.cgi?T=JS&PAGE=reference&D=med4&NEWS=N&AN=15967762>
142. van der Molen HF, Sluiter JK, Hulshof CT, Vink P, van Duivenbooden C, Holman R, Frings-Dresen MH. Implementation of participatory ergonomics intervention in construction companies. *Scandinavian Journal of Work, Environment & Health*. 2005 [cited 2005 Jun];31(3):191-204. In: Ovid MEDLINE(R) [Internet]. <http://ovidsp.ovid.com/ovidweb.cgi?T=JS&PAGE=reference&D=med4&NEWS=N&AN=15999571>
143. Favaro A, Zanetti T, Huon G, Santonastaso P. Engaging teachers in an eating disorder preventive intervention. *International Journal of Eating Disorders*. 2005 [cited 2005 Jul];38(1):73-7. In: Ovid MEDLINE(R) [Internet]. <http://ovidsp.ovid.com/ovidweb.cgi?T=JS&PAGE=reference&D=med4&NEWS=N&AN=15971252>
144. Emmons KM, Stoddard AM, Fletcher R, Gutheil C, Suarez EG, Lobb R, Weeks J, Bigby JA. Cancer prevention among working class, multiethnic adults: results of the healthy directions-health centers study. *American Journal of Public Health*. 2005 [cited 2005 Jul];95(7):1200-5. In: Ovid MEDLINE(R) [Internet]. <http://ovidsp.ovid.com/ovidweb.cgi?T=JS&PAGE=reference&D=med4&NEWS=N&AN=15933240>

145. Krahe B, Abraham C, Scheinberger-Olwig R. Can safer-sex promotion leaflets change cognitive antecedents of condom use? An experimental evaluation. *British Journal of Health Psychology*. 2005 [cited 2005 May];10(Pt 2):203-20. In: Ovid MEDLINE(R) [Internet]. <http://ovidsp.ovid.com/ovidweb.cgi?T=JS&PAGE=reference&D=med4&NEWS=N&AN=15969850>
146. McDonald MV, Pezzin LE, Feldman PH, Murtaugh CM, Peng TR. Can just-in-time, evidence-based "reminders" improve pain management among home health care nurses and their patients?. *Journal of Pain & Symptom Management*. 2005 [cited 2005 May];29(5):474-88. In: Ovid MEDLINE(R) [Internet]. <http://ovidsp.ovid.com/ovidweb.cgi?T=JS&PAGE=reference&D=med4&NEWS=N&AN=15904750>
147. Lewin S, Dick J, Zwarenstein M, Lombard CJ. Staff training and ambulatory tuberculosis treatment outcomes: a cluster randomized controlled trial in South Africa. *Bulletin of the World Health Organization*. 2005 [cited 2005 Apr];83(4):250-9. In: Ovid MEDLINE(R) [Internet]. <http://ovidsp.ovid.com/ovidweb.cgi?T=JS&PAGE=reference&D=med4&NEWS=N&AN=15868015>
148. Homer CJ, Forbes P, Horvitz L, Peterson LE, Wypij D, Heinrich P. Impact of a quality improvement program on care and outcomes for children with asthma. *Archives of Pediatrics & Adolescent Medicine*. 2005 [cited 2005 May];159(5):464-9. In: Ovid MEDLINE(R) [Internet]. <http://ovidsp.ovid.com/ovidweb.cgi?T=JS&PAGE=reference&D=med4&NEWS=N&AN=15867121>
149. Pagaiya N, Garner P. Primary care nurses using guidelines in Thailand: a randomized controlled trial. *Tropical Medicine & International Health*. 2005 [cited 2005 May];10(5):471-7. In: Ovid MEDLINE(R) [Internet]. <http://ovidsp.ovid.com/ovidweb.cgi?T=JS&PAGE=reference&D=med4&NEWS=N&AN=15860094>
150. Dijkstra RF, Braspenning JC, Huijsmans Z, Akkermans RP, van Ballegooie E, ten Have P, Casparie T, Grol RP. Introduction of diabetes passports involving both patients and professionals to improve hospital outpatient diabetes care. *Diabetes Research & Clinical Practice*. 2005 [cited 2005 May];68(2):126-34. In: Ovid MEDLINE(R) [Internet]. <http://ovidsp.ovid.com/ovidweb.cgi?T=JS&PAGE=reference&D=med4&NEWS=N&AN=15860240>
151. Braun KL, Fong M, Kaanoi ME, Kamaka ML, Gotay CC. Testing a culturally appropriate, theory-based intervention to improve colorectal cancer screening among Native Hawaiians. *Preventive Medicine*. 2005 [cited 2005 Jun];40(6):619-27. In: Ovid MEDLINE(R) [Internet]. <http://ovidsp.ovid.com/ovidweb.cgi?T=JS&PAGE=reference&D=med4&NEWS=N&AN=15850857>
152. Jackson RJ, Newman HN, Smart GJ, Stokes E, Hogan JI, Brown C, Seres J. The effects of a supervised toothbrushing programme on the caries increment of primary school children, initially aged 5-6 years. *Caries Research*. 2005 [cited 2005 Mar-Apr];39(2):108-15. In: Ovid MEDLINE(R) [Internet]. <http://ovidsp.ovid.com/ovidweb.cgi?T=JS&PAGE=reference&D=med4&NEWS=N&AN=15741722>
153. Olsen OE, Myklebust G, Engebretsen L, Holme I, Bahr R. Exercises to prevent lower limb injuries in youth sports: cluster randomised controlled trial. *BMJ*. 2005 [cited 2005 Feb 26];330(7489):449. In: Ovid MEDLINE(R) [Internet]. <http://ovidsp.ovid.com/ovidweb.cgi?T=JS&PAGE=reference&D=med4&NEWS=N&AN=15699058>
154. Jiang H, Bian Z, Tai BJ, Du MQ, Peng B. The effect of a bi-annual professional application of APF foam on dental caries increment in primary teeth: 24-month clinical trial. *Journal of Dental Research*. 2005 [cited 2005 Mar];84(3):265-8. In: Ovid MEDLINE(R) [Internet]. <http://ovidsp.ovid.com/ovidweb.cgi?T=JS&PAGE=reference&D=med4&NEWS=N&AN=15723868>
155. Marshall AL, Booth ML, Bauman AE. Promoting physical activity in Australian general practices: a randomised trial of health promotion advice versus hypertension management. *Patient Education & Counseling*. 2005 [cited 2005 Mar];56(3):283-90. In: Ovid MEDLINE(R) [Internet]. <http://ovidsp.ovid.com/ovidweb.cgi?T=JS&PAGE=reference&D=med4&NEWS=N&AN=15721970>
156. Martensson J, Stromberg A, Dahlstrom U, Karlsson JE, Fridlund B. Patients with heart failure in primary health care: effects of a nurse-led intervention on health-related quality of life and depression. *European Journal of Heart Failure*. 2005 [cited 2005 Mar 16];7(3):393-403. In: Ovid MEDLINE(R) [Internet]. <http://ovidsp.ovid.com/ovidweb.cgi?T=JS&PAGE=reference&D=med4&NEWS=N&AN=15718180>
157. Thompson DR, Roebuck A, Stewart S. Effects of a nurse-led, clinic and home-based intervention on recurrent hospital use in chronic heart failure. *European Journal of Heart Failure*. 2005 [cited 2005 Mar 16];7(3):377-84. In: Ovid MEDLINE(R) [Internet]. <http://ovidsp.ovid.com/ovidweb.cgi?T=JS&PAGE=reference&D=med4&NEWS=N&AN=15718178>
158. Ackermann RT, Deyo RA, LoGerfo JP. Prompting primary providers to increase community exercise referrals for older adults: a randomized trial. *Journal of the American Geriatrics Society*. 2005 [cited 2005 Feb];53(2):283-9. In: Ovid MEDLINE(R) [Internet]. <http://ovidsp.ovid.com/ovidweb.cgi?T=JS&PAGE=reference&D=med4&NEWS=N&AN=15673353>
159. Verhagen EA, van Tulder M, van der Beek AJ, Bouter LM, van Mechelen W. An economic evaluation of a proprioceptive balance board training programme for the prevention of ankle sprains in volleyball. *British Journal of Sports Medicine*. 2005 [cited 2005 Feb];39(2):111-5. In: Ovid MEDLINE(R) [Internet]. <http://ovidsp.ovid.com/ovidweb.cgi?T=JS&PAGE=reference&D=med4&NEWS=N&AN=15665210>
160. Arnason A, Engebretsen L, Bahr R. No effect of a video-based awareness program on the rate of soccer injuries. *American Journal of Sports Medicine*. 2005 [cited 2005 Jan];33(1):77-84. In: Ovid MEDLINE(R) [Internet]. <http://ovidsp.ovid.com/ovidweb.cgi?T=JS&PAGE=reference&D=med4&NEWS=N&AN=15611002>
161. Peng B, Petersen PE, Bian Z, Tai B, Jiang H. Can school-based oral health education and a sugar-free chewing gum program improve oral health? Results from a two-year study in PR China. *Acta Odontologica Scandinavica*. 2004 [cited 2004 Dec];62(6):328-32. In: Ovid MEDLINE(R) [Internet]. <http://ovidsp.ovid.com/ovidweb.cgi?T=JS&PAGE=reference&D=med4&NEWS=N&AN=15848976>

162. Verheijden MW, Van der Veen JE, Bakx JC, Akkermans RP, Van den Hoogen HJ, Van Staveren WA, Van Weel C. Stage-matched nutrition guidance: stages of change and fat consumption in Dutch patients at elevated cardiovascular risk. *Journal of Nutrition Education & Behavior*. 2004 [cited 2004 Sep-Oct];36(5):228-37. In: Ovid MEDLINE(R) [Internet]. <http://ovidsp.ovid.com/ovidweb.cgi?T=JS&PAGE=reference&D=med4&NEWS=N&AN=15707545>
163. Eklof M, Hagberg M, Toomingas A, Tornqvist EW. Feedback of workplace data to individual workers, workgroups or supervisors as a way to stimulate working environment activity: a cluster randomized controlled study. *International Archives of Occupational & Environmental Health*. 2004 [cited 2004 Oct];77(7):505-14. In: Ovid MEDLINE(R) [Internet]. <http://ovidsp.ovid.com/ovidweb.cgi?T=JS&PAGE=reference&D=med4&NEWS=N&AN=15558302>
164. Bennett JB, Patterson CR, Reynolds GS, Wiitala WL, Lehman WE. Team awareness, problem drinking, and drinking climate: workplace social health promotion in a policy context. *American Journal of Health Promotion*. 2004 [cited 2004 Nov-Dec];19(2):103-13. In: Ovid MEDLINE(R) [Internet]. <http://ovidsp.ovid.com/ovidweb.cgi?T=JS&PAGE=reference&D=med4&NEWS=N&AN=15559710>
165. Munro JF, Nicholl JP, Brazier JE, Davey R, Cochrane T. Cost effectiveness of a community based exercise programme in over 65 year olds: cluster randomised trial. *Journal of Epidemiology & Community Health*. 2004 [cited 2004 Dec];58(12):1004-10. In: Ovid MEDLINE(R) [Internet]. <http://ovidsp.ovid.com/ovidweb.cgi?T=JS&PAGE=reference&D=med4&NEWS=N&AN=15547060>
166. Horbar JD, Carpenter JH, Buzas J, Soll RF, Suresh G, Bracken MB, Leviton LC, Plsek PE, Sinclair JC. Collaborative quality improvement to promote evidence based surfactant for preterm infants: a cluster randomised trial. *BMJ*. 2004 [cited 2004 Oct 30];329(7473):1004. In: Ovid MEDLINE(R) [Internet]. <http://ovidsp.ovid.com/ovidweb.cgi?T=JS&PAGE=reference&D=med4&NEWS=N&AN=15514344>
167. Dyer CA, Taylor GJ, Reed M, Dyer CA, Robertson DR, Harrington R. Falls prevention in residential care homes: a randomised controlled trial. *Age & Ageing*. 2004 [cited 2004 Nov];33(6):596-602. In: Ovid MEDLINE(R) [Internet]. <http://ovidsp.ovid.com/ovidweb.cgi?T=JS&PAGE=reference&D=med4&NEWS=N&AN=15381507>
168. O'Halloran PD, Cran GW, Beringer TR, Kernohan G, O'Neill C, Orr J, Dunlop L, Murray LJ. A cluster randomised controlled trial to evaluate a policy of making hip protectors available to residents of nursing homes. *Age & Ageing*. 2004 [cited 2004 Nov];33(6):582-8. In: Ovid MEDLINE(R) [Internet]. <http://ovidsp.ovid.com/ovidweb.cgi?T=JS&PAGE=reference&D=med4&NEWS=N&AN=15381506>
169. Fidler V, Nap R, Miranda DR. The effect of a managerial-based intervention on the occurrence of out-of-range-measurements and mortality in intensive care units. *Journal of Critical Care*. 2004 [cited 2004 Sep];19(3):130-4. In: Ovid MEDLINE(R) [Internet]. <http://ovidsp.ovid.com/ovidweb.cgi?T=JS&PAGE=reference&D=med4&NEWS=N&AN=15484172>
170. van Eijken M, Wensing M, de Konink M, Vernooy M, Zielhuis G, Lagro T, Rikkert MO, Grol R. Health education on self-management and seeking health care in older adults: a randomised trial. *Patient Education & Counseling*. 2004 [cited 2004 Oct];55(1):48-54. In: Ovid MEDLINE(R) [Internet]. <http://ovidsp.ovid.com/ovidweb.cgi?T=JS&PAGE=reference&D=med4&NEWS=N&AN=15476989>
171. Stanton B, Cole M, Galbraith J, Li X, Pendleton S, Cottrel L, Marshall S, Wu Y, Kaljee L. Randomized trial of a parent intervention: parents can make a difference in long-term adolescent risk behaviors, perceptions, and knowledge. *Archives of Pediatrics & Adolescent Medicine*. 2004 [cited 2004 Oct];158(10):947-55. In: Ovid MEDLINE(R) [Internet]. <http://ovidsp.ovid.com/ovidweb.cgi?T=JS&PAGE=reference&D=med4&NEWS=N&AN=15466681>
172. Christensen MB, Christensen B, Mortensen JT, Olesen F. Intervention among frequent attenders of the out-of-hours service: a stratified cluster randomized controlled trial. *Scandinavian Journal of Primary Health Care*. 2004 [cited 2004 Sep];22(3):180-6. In: Ovid MEDLINE(R) [Internet]. <http://ovidsp.ovid.com/ovidweb.cgi?T=JS&PAGE=reference&D=med4&NEWS=N&AN=15370796>
173. Manandhar DS, Osrin D, Shrestha BP, Mesko N, Morrison J, Tumbahangphe KM, Tamang S, Thapa S, Shrestha D, Thapa B, Shrestha JR, Wade A, Borghi J, Standing H, Manandhar M, Costello AM, Members of the MIRA Makwanpur trial team. Effect of a participatory intervention with women's groups on birth outcomes in Nepal: cluster-randomised controlled trial. *Lancet*. 2004 [cited 2004 Sep 11-17];364(9438):970-9. In: Ovid MEDLINE(R) [Internet]. <http://ovidsp.ovid.com/ovidweb.cgi?T=JS&PAGE=reference&D=med4&NEWS=N&AN=15364188>
174. Dietrich AJ, Oxman TE, Williams JW Jr, Schulberg HC, Bruce ML, Lee PW, Barry S, Raue PJ, Lefever JJ, Heo M, Rost K, Kroenke K, Gerrity M, Nutting PA. Re-engineering systems for the treatment of depression in primary care: cluster randomised controlled trial. *BMJ*. 2004 [cited 2004 Sep 11];329(7466):602. In: Ovid MEDLINE(R) [Internet]. <http://ovidsp.ovid.com/ovidweb.cgi?T=JS&PAGE=reference&D=med4&NEWS=N&AN=15345600>
175. Trevino RP, Yin Z, Hernandez A, Hale DE, Garcia OA, Mobley C. Impact of the Bienestar school-based diabetes mellitus prevention program on fasting capillary glucose levels: a randomized controlled trial. *Archives of Pediatrics & Adolescent Medicine*. 2004 [cited 2004 Sep];158(9):911-7. In: Ovid MEDLINE(R) [Internet]. <http://ovidsp.ovid.com/ovidweb.cgi?T=JS&PAGE=reference&D=med4&NEWS=N&AN=15351759>
176. Heiman H, Bates DW, Fairchild D, Shaykevich S, Lehmann LS. Improving completion of advance directives in the primary care setting: a randomized controlled trial. *American Journal of Medicine*. 2004 [cited 2004 Sep 1];117(5):318-24. In: Ovid MEDLINE(R) [Internet]. <http://ovidsp.ovid.com/ovidweb.cgi?T=JS&PAGE=reference&D=med4&NEWS=N&AN=15336581>

177. Welschen I, Kuyvenhoven MM, Hoes AW, Verheij TJ. Effectiveness of a multiple intervention to reduce antibiotic prescribing for respiratory tract symptoms in primary care: randomised controlled trial. *BMJ*. 2004 [cited 2004 Aug 21];329(7463):431. In: Ovid MEDLINE(R) [Internet]. <http://ovidsp.ovid.com/ovidweb.cgi?T=JS&PAGE=reference&D=med4&NEWS=N&AN=15297305>
178. Mohan P, Iyengar SD, Martines J, Cousens S, Sen K. Impact of counselling on careseeking behaviour in families with sick children: cluster randomised trial in rural India. *BMJ*. 2004 [cited 2004 Jul 31];329(7460):266. In: Ovid MEDLINE(R) [Internet]. <http://ovidsp.ovid.com/ovidweb.cgi?T=JS&PAGE=reference&D=med4&NEWS=N&AN=15265815>
179. Whelan T, Levine M, Willan A, Gafni A, Sanders K, Mirsky D, Chambers S, O'Brien MA, Reid S, Dubois S. Effect of a decision aid on knowledge and treatment decision making for breast cancer surgery: a randomized trial. *JAMA*. 2004 [cited 2004 Jul 28];292(4):435-41. In: Ovid MEDLINE(R) [Internet]. <http://ovidsp.ovid.com/ovidweb.cgi?T=JS&PAGE=reference&D=med4&NEWS=N&AN=15280341>
180. van Lier PA, Muthen BO, van der Sar RM, Crijnen AA. Preventing disruptive behavior in elementary schoolchildren: impact of a universal classroom-based intervention. *Journal of Consulting & Clinical Psychology*. 2004 [cited 2004 Jun];72(3):467-78. In: Ovid MEDLINE(R) [Internet]. <http://ovidsp.ovid.com/ovidweb.cgi?T=JS&PAGE=reference&D=med4&NEWS=N&AN=15279530>
181. Reed DB, Kidd PS. Collaboration between nurses and agricultural teachers to prevent adolescent agricultural injuries: the Agricultural Disability Awareness and Risk Education Model. *Public Health Nursing*. 2004 [cited 2004 Jul-Aug];21(4):323-30. In: Ovid MEDLINE(R) [Internet]. <http://ovidsp.ovid.com/ovidweb.cgi?T=JS&PAGE=reference&D=med4&NEWS=N&AN=15260837>
182. Resnicow K, Campbell MK, Carr C, McCarty F, Wang T, Periasamy S, Rahotep S, Doyle C, Williams A, Stables G. Body and soul. A dietary intervention conducted through African-American churches. *American Journal of Preventive Medicine*. 2004 [cited 2004 Aug];27(2):97-105. In: Ovid MEDLINE(R) [Internet]. <http://ovidsp.ovid.com/ovidweb.cgi?T=JS&PAGE=reference&D=med4&NEWS=N&AN=15261895>
183. Du X, Zhu K, Trube A, Zhang Q, Ma G, Hu X, Fraser DR, Greenfield H. School-milk intervention trial enhances growth and bone mineral accretion in Chinese girls aged 10-12 years in Beijing. *British Journal of Nutrition*. 2004 [cited 2004 Jul];92(1):159-68. In: Ovid MEDLINE(R) [Internet]. <http://ovidsp.ovid.com/ovidweb.cgi?T=JS&PAGE=reference&D=med4&NEWS=N&AN=15230999>
184. Priestley G, Watson W, Rashidian A, Mozley C, Russell D, Wilson J, Cope J, Hart D, Kay D, Cowley K, Pateraki J. Introducing Critical Care Outreach: a ward-randomised trial of phased introduction in a general hospital. *Intensive Care Medicine*. 2004 [cited 2004 Jul];30(7):1398-404. In: Ovid MEDLINE(R) [Internet]. <http://ovidsp.ovid.com/ovidweb.cgi?T=JS&PAGE=reference&D=med4&NEWS=N&AN=15112033>
185. Althabe F, Belizan JM, Villar J, Alexander S, Bergel E, Ramos S, Romero M, Donner A, Lindmark G, Langer A, Farnot U, Cecatti JG, Carroli G, Kestler E, Latin American Caesarean Section Study Group. Mandatory second opinion to reduce rates of unnecessary caesarean sections in Latin America: a cluster randomised controlled trial. *Lancet*. 2004 [cited 2004 Jun 12];363(9425):1934-40. In: Ovid MEDLINE(R) [Internet]. <http://ovidsp.ovid.com/ovidweb.cgi?T=JS&PAGE=reference&D=med4&NEWS=N&AN=15194252>
186. Rivera JA, Sotres-Alvarez D, Habicht JP, Shamah T, Villalpando S. Impact of the Mexican program for education, health, and nutrition (Progresa) on rates of growth and anemia in infants and young children: a randomized effectiveness study. *JAMA*. 2004 [cited 2004 Jun 2];291(21):2563-70. In: Ovid MEDLINE(R) [Internet]. <http://ovidsp.ovid.com/ovidweb.cgi?T=JS&PAGE=reference&D=med4&NEWS=N&AN=15173147>
187. Pbert L, Ockene JK, Zapka J, Ma Y, Goins KV, Oncken C, Stoddard AM. A community health center smoking-cessation intervention for pregnant and postpartum women. *American Journal of Preventive Medicine*. 2004 [cited 2004 Jun];26(5):377-85. In: Ovid MEDLINE(R) [Internet]. <http://ovidsp.ovid.com/ovidweb.cgi?T=JS&PAGE=reference&D=med4&NEWS=N&AN=15165653>
188. Soekarjo DD, Pee Sd S, Kusin JA, Schreurs WH, Schultink W, Muhilal, Bloem MW. Effectiveness of weekly vitamin A (10,000 IU) and iron (60 mg) supplementation for adolescent boys and girls through schools in rural and urban East Java, Indonesia. *European Journal of Clinical Nutrition*. 2004 [cited 2004 Jun];58(6):927-37. In: Ovid MEDLINE(R) [Internet]. <http://ovidsp.ovid.com/ovidweb.cgi?T=JS&PAGE=reference&D=med4&NEWS=N&AN=15164114>
189. Ravaut P, Keita H, Porcher R, Durand-Stocco C, Desmots JM, Mantz J. Randomized clinical trial to assess the effect of an educational programme designed to improve nurses' assessment and recording of postoperative pain. *British Journal of Surgery*. 2004 [cited 2004 Jun];91(6):692-8. In: Ovid MEDLINE(R) [Internet]. <http://ovidsp.ovid.com/ovidweb.cgi?T=JS&PAGE=reference&D=med4&NEWS=N&AN=15164436>
190. Crotty M, Whitehead C, Rowett D, Halbert J, Weller D, Finucane P, Esterman A. An outreach intervention to implement evidence based practice in residential care: a randomized controlled trial [ISRCTN67855475]. *BMC Health Services Research*. 2004 [cited 2004 Apr 6];4(1):6. In: Ovid MEDLINE(R) [Internet]. <http://ovidsp.ovid.com/ovidweb.cgi?T=JS&PAGE=reference&D=med4&NEWS=N&AN=15066200>
191. Purath J, Miller AM, McCabe G, Wilbur J. A brief intervention to increase physical activity in sedentary working women. *Canadian Journal of Nursing Research*. 2004 [cited 2004 Mar];36(1):76-91. In: Ovid MEDLINE(R) [Internet]. <http://ovidsp.ovid.com/ovidweb.cgi?T=JS&PAGE=reference&D=med4&NEWS=N&AN=15133920>
192. Theodossiadis J, Murdoch I, Cousens S. Glaucoma case finding: a cluster-randomised intervention trial. *Eye*. 2004 [cited 2004 May];18(5):483-90. In: Ovid MEDLINE(R) [Internet]. <http://ovidsp.ovid.com/ovidweb.cgi?T=JS&PAGE=reference&D=med4&NEWS=N&AN=15131679>



193. Coyle KK, Kirby DB, Marin BV, Gomez CA, Gregorich SE. Draw the line/respect the line: a randomized trial of a middle school intervention to reduce sexual risk behaviors. *American Journal of Public Health*. 2004 [cited 2004 May];94(5):843-51. In: Ovid MEDLINE(R) [Internet]. <http://ovidsp.ovid.com/ovidweb.cgi?T=JS&PAGE=reference&D=med4&NEWS=N&AN=15117710>
194. Byng R, Jones R, Leese M, Hamilton B, McCrone P, Craig T. Exploratory cluster randomised controlled trial of shared care development for long-term mental illness. *British Journal of General Practice*. 2004 [cited 2004 Apr];54(501):259-66. In: Ovid MEDLINE(R) [Internet]. <http://ovidsp.ovid.com/ovidweb.cgi?T=JS&PAGE=reference&D=med4&NEWS=N&AN=15113492>
195. Boundouki G, Humphris G, Field A. Knowledge of oral cancer, distress and screening intentions: longer term effects of a patient information leaflet. *Patient Education & Counseling*. 2004 [cited 2004 Apr];53(1):71-7. In: Ovid MEDLINE(R) [Internet]. <http://ovidsp.ovid.com/ovidweb.cgi?T=JS&PAGE=reference&D=med4&NEWS=N&AN=15062907>
196. Kendrick D, Royal S, Lids for Kids project team. Cycle helmet ownership and use; a cluster randomised controlled trial in primary school children in deprived areas. *Archives of Disease in Childhood*. 2004 [cited 2004 Apr];89(4):330-5. In: Ovid MEDLINE(R) [Internet]. <http://ovidsp.ovid.com/ovidweb.cgi?T=JS&PAGE=reference&D=med4&NEWS=N&AN=15033841>
197. Bond L, Thomas L, Coffey C, Glover S, Butler H, Carlin JB, Patton G. Long-term impact of the Gatehouse Project on cannabis use of 16-year-olds in Australia. *Journal of School Health*. 2004 [cited 2004 Jan];74(1):23-9. In: Ovid MEDLINE(R) [Internet]. <http://ovidsp.ovid.com/ovidweb.cgi?T=JS&PAGE=reference&D=med4&NEWS=N&AN=15022372>
198. Ausems M, Mesters I, van Breukelen G, De Vries H. Effects of in-school and tailored out-of-school smoking prevention among Dutch vocational school students. *Health Education Research*. 2004 [cited 2004 Feb];19(1):51-63. In: Ovid MEDLINE(R) [Internet]. <http://ovidsp.ovid.com/ovidweb.cgi?T=JS&PAGE=reference&D=med4&NEWS=N&AN=15020545>
199. Subramanian U, Fihn SD, Weinberger M, Plue L, Smith FE, Udriș EM, McDonell MB, Eckert GJ, Temkit M, Zhou XH, Chen L, Tierney WM. A controlled trial of including symptom data in computer-based care suggestions for managing patients with chronic heart failure. *American Journal of Medicine*. 2004 [cited 2004 Mar 15];116(6):375-84. In: Ovid MEDLINE(R) [Internet]. <http://ovidsp.ovid.com/ovidweb.cgi?T=JS&PAGE=reference&D=med4&NEWS=N&AN=15006586>
200. Akici A, Kalaca S, Ugurlu MU, Karaalp A, Cali S, Oktay S. Impact of a short postgraduate course in rational pharmacotherapy for general practitioners. *British Journal of Clinical Pharmacology*. 2004 [cited 2004 Mar];57(3):310-21. In: Ovid MEDLINE(R) [Internet]. <http://ovidsp.ovid.com/ovidweb.cgi?T=JS&PAGE=reference&D=med4&NEWS=N&AN=14998427>
201. Proper KI, van der Beek AJ, Hildebrandt VH, Twisk JW, van Mechelen W. Worksite health promotion using individual counselling and the effectiveness on sick leave; results of a randomised controlled trial. *Occupational & Environmental Medicine*. 2004 [cited 2004 Mar];61(3):275-9. In: Ovid MEDLINE(R) [Internet]. <http://ovidsp.ovid.com/ovidweb.cgi?T=JS&PAGE=reference&D=med4&NEWS=N&AN=14985524>
202. Dey P, Simpson CW, Collins SI, Hodgson G, Dowrick CF, Simison AJ, Rose MJ. Implementation of RCGP guidelines for acute low back pain: a cluster randomised controlled trial. *British Journal of General Practice*. 2004 [cited 2004 Jan];54(498):33-7. In: Ovid MEDLINE(R) [Internet]. <http://ovidsp.ovid.com/ovidweb.cgi?T=JS&PAGE=reference&D=med4&NEWS=N&AN=14965404>
203. Hambidge SJ, Davidson AJ, Phibbs SL, Chandramouli V, Zerbe G, LeBaron CW, Steiner JF. Strategies to improve immunization rates and well-child care in a disadvantaged population: a cluster randomized controlled trial. *Archives of Pediatrics & Adolescent Medicine*. 2004 [cited 2004 Feb];158(2):162-9. In: Ovid MEDLINE(R) [Internet]. <http://ovidsp.ovid.com/ovidweb.cgi?T=JS&PAGE=reference&D=med4&NEWS=N&AN=14757608>
204. Snooks H, Foster T, Nicholl J. Results of an evaluation of the effectiveness of triage and direct transportation to minor injuries units by ambulance crews. *Emergency Medicine Journal*. 2004 [cited 2004 Jan];21(1):105-11. In: Ovid MEDLINE(R) [Internet]. <http://ovidsp.ovid.com/ovidweb.cgi?T=JS&PAGE=reference&D=med4&NEWS=N&AN=14734396>
205. Griffiths C, Foster G, Barnes N, Eldridge S, Tate H, Begum S, Wiggins M, Dawson C, Livingstone AE, Chambers M, Coats T, Harris R, Feder GS. Specialist nurse intervention to reduce unscheduled asthma care in a deprived multiethnic area: the east London randomised controlled trial for high risk asthma (ELECTRA). *BMJ*. 2004 [cited 2004 Jan 17];328(7432):144. In: Ovid MEDLINE(R) [Internet]. <http://ovidsp.ovid.com/ovidweb.cgi?T=JS&PAGE=reference&D=med4&NEWS=N&AN=14718266>
206. Boudreau RM, McNally C, Rensing EM, Campbell MK. Improving the timeliness of written patient notification of mammography results by mammography centers. *Breast Journal*. 2004 [cited 2004 Jan-Feb];10(1):10-9. In: Ovid MEDLINE(R) [Internet]. <http://ovidsp.ovid.com/ovidweb.cgi?T=JS&PAGE=reference&D=med4&NEWS=N&AN=14717754>
207. Davis J, Roberts R, Davidson DL, Norman A, Ogston S, Grimshaw JM, Davey P, Grant J, Ruta D. Implementation strategies for a Scottish national epilepsy guideline in primary care: results of the Tayside Implementation of Guidelines in Epilepsy Randomized (TIGER) trial. *Epilepsia*. 2004 [cited 2004 Jan];45(1):28-34. In: Ovid MEDLINE(R) [Internet]. <http://ovidsp.ovid.com/ovidweb.cgi?T=JS&PAGE=reference&D=med4&NEWS=N&AN=14692904>
208. Winch PJ, Bagayoko A, Diawara A, Kane M, Thiero F, Gilroy K, Daou Z, Berthe Z, Swedberg E. Increases in correct administration of chloroquine in the home and referral of sick children to health facilities through a community-based intervention in Bougouni District, Mali. *Transactions of the Royal Society of Tropical Medicine & Hygiene*. 2003 [cited 2003 Sep-Oct];97(5):481-90. In: Ovid MEDLINE(R) [Internet]. <http://ovidsp.ovid.com/ovidweb.cgi?T=JS&PAGE=reference&D=med4&NEWS=N&AN=15307407>
209. Weller D, May F, Rowett D, Esterman A, Pinnock C, Nicholson S, Doust J, Silagy C. Promoting better use of the PSA test in general practice: randomized controlled trial of educational strategies based on outreach visits and mailout. *Family Practice*. 2003

- [cited 2003 Dec];20(6):655-61. In: Ovid MEDLINE(R) [Internet].  
<http://ovidsp.ovid.com/ovidweb.cgi?T=JS&PAGE=reference&D=med4&NEWS=N&AN=14701888>
210. Kaner E, Lock C, Heather N, McNamee P, Bond S. Promoting brief alcohol intervention by nurses in primary care: a cluster randomised controlled trial. *Patient Education & Counseling*. 2003 [cited 2003 Nov];51(3):277-84. In: Ovid MEDLINE(R) [Internet].  
<http://ovidsp.ovid.com/ovidweb.cgi?T=JS&PAGE=reference&D=med4&NEWS=N&AN=14630384>
211. Kennedy A, Robinson A, Hann M, Thompson D, Wilkin D, North-West Region Gastrointestinal Research Group. A cluster-randomised controlled trial of a patient-centred guidebook for patients with ulcerative colitis: effect on knowledge, anxiety and quality of life. *Health & Social Care in the Community*. 2003 [cited 2003 Jan];11(1):64-72. In: Ovid MEDLINE(R) [Internet].  
<http://ovidsp.ovid.com/ovidweb.cgi?T=JS&PAGE=reference&D=med4&NEWS=N&AN=14629234>
212. Havas S, Anliker J, Greenberg D, Block G, Block T, Blik C, Langenberg P, DiClemente C. Final results of the Maryland WIC Food for Life Program. *Preventive Medicine*. 2003 [cited 2003 Nov];37(5):406-16. In: Ovid MEDLINE(R) [Internet].  
<http://ovidsp.ovid.com/ovidweb.cgi?T=JS&PAGE=reference&D=med4&NEWS=N&AN=14572425>
213. Kennedy A, Nelson E, Reeves D, Richardson G, Roberts C, Robinson A, Rogers A, Sculpher M, Thompson D. A randomised controlled trial to assess the impact of a package comprising a patient-orientated, evidence-based self-help guidebook and patient-centred consultations on disease management and satisfaction in inflammatory bowel disease. *Health Technology Assessment (Winchester, England)*. 2003 [cited 2003];7(28):iii, 1-113. In: Ovid MEDLINE(R) [Internet].  
<http://ovidsp.ovid.com/ovidweb.cgi?T=JS&PAGE=reference&D=med4&NEWS=N&AN=14567905>
214. Blinkhorn AS, Gratrix D, Holloway PJ, Wainwright-Stringer YM, Ward SJ, Worthington HV. A cluster randomised, controlled trial of the value of dental health educators in general dental practice. *British Dental Journal*. 2003 [cited 2003 Oct 11];195(7):395-400; discussion 385. In: Ovid MEDLINE(R) [Internet].  
<http://ovidsp.ovid.com/ovidweb.cgi?T=JS&PAGE=reference&D=med4&NEWS=N&AN=14551632>
215. Meghan SL, Wong E, Jhangri GS, Wells HM, Michaelchuk DR, Boechler VL, Befus AD, Hessel PA. Evaluation of an education program for elementary school children with asthma. *Journal of Asthma*. 2003 [cited 2003];40(5):523-33. In: Ovid MEDLINE(R) [Internet]. <http://ovidsp.ovid.com/ovidweb.cgi?T=JS&PAGE=reference&D=med4&NEWS=N&AN=14529102>
216. Mundy LM, Leet TL, Darst K, Schnitzler MA, Dunagan WC. Early mobilization of patients hospitalized with community-acquired pneumonia. *Chest*. 2003 [cited 2003 Sep];124(3):883-9. In: Ovid MEDLINE(R) [Internet].  
<http://ovidsp.ovid.com/ovidweb.cgi?T=JS&PAGE=reference&D=med4&NEWS=N&AN=12970012>
217. Katz SJ, Moyer CA, Cox DT, Stern DT. Effect of a triage-based E-mail system on clinic resource use and patient and physician satisfaction in primary care: a randomized controlled trial. *Journal of General Internal Medicine*. 2003 [cited 2003 Sep];18(9):736-44. In: Ovid MEDLINE(R) [Internet].  
<http://ovidsp.ovid.com/ovidweb.cgi?T=JS&PAGE=reference&D=med4&NEWS=N&AN=12950483>
218. Piper ME, Fiore MC, Smith SS, Jorenby DE, Wilson JR, Zehner ME, Baker TB. Use of the vital sign stamp as a systematic screening tool to promote smoking cessation. *Mayo Clinic Proceedings*. 2003 [cited 2003 Jun];78(6):716-22. In: Ovid MEDLINE(R) [Internet]. <http://ovidsp.ovid.com/ovidweb.cgi?T=JS&PAGE=reference&D=med4&NEWS=N&AN=12934781>
219. Crone MR, Reijneveld SA, Willemsen MC, van Leerdam FJ, Spruijt RD, Sing RA. Prevention of smoking in adolescents with lower education: a school based intervention study. *Journal of Epidemiology & Community Health*. 2003 [cited 2003 Sep];57(9):675-80. In: Ovid MEDLINE(R) [Internet].  
<http://ovidsp.ovid.com/ovidweb.cgi?T=JS&PAGE=reference&D=med4&NEWS=N&AN=12933772>
220. Kousgaard KR, Nielsen JD, Olesen F, Jensen AB. General practitioner assessment of structured oncological information accompanying newly referred cancer patients. *Scandinavian Journal of Primary Health Care*. 2003 [cited 2003 Jun];21(2):110-4. In: Ovid MEDLINE(R) [Internet]. <http://ovidsp.ovid.com/ovidweb.cgi?T=JS&PAGE=reference&D=med4&NEWS=N&AN=12877375>
221. Humphris GM, Field EA. The immediate effect on knowledge, attitudes and intentions in primary care attenders of a patient information leaflet: a randomized control trial replication and extension. *British Dental Journal*. 2003 [cited 2003 Jun 28];194(12):683-8; discussion 675. In: Ovid MEDLINE(R) [Internet].  
<http://ovidsp.ovid.com/ovidweb.cgi?T=JS&PAGE=reference&D=med4&NEWS=N&AN=12830193>
222. Bolton P, Bass J, Neugebauer R, Verdelli H, Clougherty KF, Wickramaratne P, Speelman L, Ndogoni L, Weissman M. Group interpersonal psychotherapy for depression in rural Uganda: a randomized controlled trial. *JAMA*. 2003 [cited 2003 Jun 18];289(23):3117-24. In: Ovid MEDLINE(R) [Internet].  
<http://ovidsp.ovid.com/ovidweb.cgi?T=JS&PAGE=reference&D=med4&NEWS=N&AN=12813117>
223. Bhandari N, Bahl R, Mazumdar S, Martinez J, Black RE, Bhan MK, Infant Feeding Study Group. Effect of community-based promotion of exclusive breastfeeding on diarrhoeal illness and growth: a cluster randomised controlled trial. *Lancet*. 2003 [cited 2003 Apr 26];361(9367):1418-23. In: Ovid MEDLINE(R) [Internet].  
<http://ovidsp.ovid.com/ovidweb.cgi?T=JS&PAGE=reference&D=med4&NEWS=N&AN=12727395>
224. Filippi A, Sabatini A, Badioli L, Samani F, Mazzaglia G, Catapano A, Cricelli C. Effects of an automated electronic reminder in changing the antiplatelet drug-prescribing behavior among Italian general practitioners in diabetic patients: an intervention trial. *Diabetes Care*. 2003 [cited 2003 May];26(5):1497-500. In: Ovid MEDLINE(R) [Internet].  
<http://ovidsp.ovid.com/ovidweb.cgi?T=JS&PAGE=reference&D=med4&NEWS=N&AN=12716811>

225. Elley CR, Kerse N, Arroll B, Robinson E. Effectiveness of counselling patients on physical activity in general practice: cluster randomised controlled trial. *BMJ*. 2003 [cited 2003 Apr 12];326(7393):793. In: Ovid MEDLINE(R) [Internet]. <http://ovidsp.ovid.com/ovidweb.cgi?T=JS&PAGE=reference&D=med4&NEWS=N&AN=12689976>
226. Flannery DJ, Vazsonyi AT, Liao AK, Guo S, Powell KE, Atha H, Vesterdal W, Embry D. Initial behavior outcomes for the peacebuilders universal school-based violence prevention program. *Developmental Psychology*. 2003 [cited 2003 Mar];39(2):292-308. In: Ovid MEDLINE(R) [Internet]. <http://ovidsp.ovid.com/ovidweb.cgi?T=JS&PAGE=reference&D=med4&NEWS=N&AN=12661887>
227. Christian P, Khatry SK, Katz J, Pradhan EK, LeClerq SC, Shrestha SR, Adhikari RK, Sommer A, West KP Jr. Effects of alternative maternal micronutrient supplements on low birth weight in rural Nepal: double blind randomised community trial. *BMJ*. 2003 [cited 2003 Mar 15];326(7389):571. In: Ovid MEDLINE(R) [Internet]. <http://ovidsp.ovid.com/ovidweb.cgi?T=JS&PAGE=reference&D=med4&NEWS=N&AN=12637400>
228. Ammerman AS, Keyserling TC, Atwood JR, Hosking JD, Zayed H, Krasny C. A randomized controlled trial of a public health nurse directed treatment program for rural patients with high blood cholesterol. *Preventive Medicine*. 2003 [cited 2003 Mar];36(3):340-51. In: Ovid MEDLINE(R) [Internet]. <http://ovidsp.ovid.com/ovidweb.cgi?T=JS&PAGE=reference&D=med4&NEWS=N&AN=12634025>
229. Kogan JR, Reynolds EE, Shea JA. Effectiveness of report cards based on chart audits of residents' adherence to practice guidelines on practice performance: a randomized controlled trial. *Teaching & Learning in Medicine*. 2003 [cited 2003];15(1):25-30. In: Ovid MEDLINE(R) [Internet]. <http://ovidsp.ovid.com/ovidweb.cgi?T=JS&PAGE=reference&D=med4&NEWS=N&AN=12632705>
230. McDonnell R, O'Morain C, Boland M, Culhane A, Johnson Z, Johnson H, Murray F, Doyle D. Helicobacter Pylori eradication therapy: getting research into practice. *Irish Medical Journal*. 2003 [cited 2003 Jan];96(1):13-6. In: Ovid MEDLINE(R) [Internet]. <http://ovidsp.ovid.com/ovidweb.cgi?T=JS&PAGE=reference&D=med4&NEWS=N&AN=12617436>
231. Meigs JB, Cagliero E, Dubey A, Murphy-Sheehy P, Gildesgame C, Chueh H, Barry MJ, Singer DE, Nathan DM. A controlled trial of web-based diabetes disease management: the MGH diabetes primary care improvement project. *Diabetes Care*. 2003 [cited 2003 Mar];26(3):750-7. In: Ovid MEDLINE(R) [Internet]. <http://ovidsp.ovid.com/ovidweb.cgi?T=JS&PAGE=reference&D=med4&NEWS=N&AN=12610033>
232. Perry CL, Komro KA, Veblen-Mortenson S, Bosma LM, Farbaksh K, Munson KA, Stigler MH, Lytle LA. A randomized controlled trial of the middle and junior high school D.A.R.E. and D.A.R.E. Plus programs. *Archives of Pediatrics & Adolescent Medicine*. 2003 [cited 2003 Feb];157(2):178-84. In: Ovid MEDLINE(R) [Internet]. <http://ovidsp.ovid.com/ovidweb.cgi?T=JS&PAGE=reference&D=med4&NEWS=N&AN=12580689>
233. Hoffman L, Enders J, Luo J, Segal R, Pippins J, Kimberlin C. Impact of an antidepressant management program on medication adherence. *American Journal of Managed Care*. 2003 [cited 2003 Jan];9(1):70-80. In: Ovid MEDLINE(R) [Internet]. <http://ovidsp.ovid.com/ovidweb.cgi?T=JS&PAGE=reference&D=med4&NEWS=N&AN=12549816>
234. Zheng S, Chen K, Liu X, Ma X, Yu H, Chen K, Yao K, Zhou L, Wang L, Qiu P, Deng Y, Zhang S. Cluster randomization trial of sequence mass screening for colorectal cancer. *Diseases of the Colon & Rectum*. 2003 [cited 2003 Jan];46(1):51-8. In: Ovid MEDLINE(R) [Internet]. <http://ovidsp.ovid.com/ovidweb.cgi?T=JS&PAGE=reference&D=med4&NEWS=N&AN=12544522>
235. Hedrick SC, Chaney EF, Felker B, Liu CF, Hasenberg N, Heagerty P, Buchanan J, Bagala R, Greenberg D, Paden G, Fihn SD, Katon W. Effectiveness of collaborative care depression treatment in Veterans' Affairs primary care. *Journal of General Internal Medicine*. 2003 [cited 2003 Jan];18(1):9-16. In: Ovid MEDLINE(R) [Internet]. <http://ovidsp.ovid.com/ovidweb.cgi?T=JS&PAGE=reference&D=med4&NEWS=N&AN=12534758>
236. Rowland D, DiGiuseppi C, Gross M, Afolabi E, Roberts I. Randomised controlled trial of site specific advice on school travel patterns. *Archives of Disease in Childhood*. 2003 [cited 2003 Jan];88(1):8-11. In: Ovid MEDLINE(R) [Internet]. <http://ovidsp.ovid.com/ovidweb.cgi?T=JS&PAGE=reference&D=med4&NEWS=N&AN=12495948>
237. Moore L, Campbell R, Whelan A, Mills N, Lupton P, Misselbrook E, Frohlich J. Self help smoking cessation in pregnancy: cluster randomised controlled trial. *BMJ*. 2002 [cited 2002 Dec 14];325(7377):1383. In: Ovid MEDLINE(R) [Internet]. <http://ovidsp.ovid.com/ovidweb.cgi?T=JS&PAGE=reference&D=med4&NEWS=N&AN=12480850>
238. Young JM, D'Este C, Ward JE. Improving family physicians' use of evidence-based smoking cessation strategies: a cluster randomization trial. *Preventive Medicine*. 2002 [cited 2002 Dec];35(6):572-83. In: Ovid MEDLINE(R) [Internet]. <http://ovidsp.ovid.com/ovidweb.cgi?T=JS&PAGE=reference&D=med4&NEWS=N&AN=12460525>
239. D'Onofrio CN, Moskowitz JM, Braverman MT. Curtailing tobacco use among youth: evaluation of project 4-health. *Health Education & Behavior*. 2002 [cited 2002 Dec];29(6):656-82. In: Ovid MEDLINE(R) [Internet]. <http://ovidsp.ovid.com/ovidweb.cgi?T=JS&PAGE=reference&D=med4&NEWS=N&AN=12456128>
240. Baqui AH, Black RE, El Arifeen S, Yunus M, Chakraborty J, Ahmed S, Vaughan JP. Effect of zinc supplementation started during diarrhoea on morbidity and mortality in Bangladeshi children: community randomised trial. *BMJ*. 2002 [cited 2002 Nov 9];325(7372):1059. In: Ovid MEDLINE(R) [Internet]. <http://ovidsp.ovid.com/ovidweb.cgi?T=JS&PAGE=reference&D=med4&NEWS=N&AN=12424162>

241. Davies B, Hodnett E, Hannah M, O'Brien-Pallas L, Pringle D, Wells G, Perinatal Partnership Program of Eastern and Southeastern Ontario and the Society of Obstetricians and Gynaecologists of Canada. Fetal health surveillance: a community-wide approach versus a tailored intervention for the implementation of clinical practice guidelines. *CMAJ Canadian Medical Association Journal*. 2002 [cited 2002 Sep 3];167(5):469-74. In: Ovid MEDLINE(R) [Internet].  
<http://ovidsp.ovid.com/ovidweb.cgi?T=JS&PAGE=reference&D=med4&NEWS=N&AN=12240812>
242. Byrne E, Nitzke S. Preschool children's acceptance of a novel vegetable following exposure to messages in a storybook. *Journal of Nutrition Education & Behavior*. 2002 [cited 2002 Jul-Aug];34(4):211-3. In: Ovid MEDLINE(R) [Internet].  
<http://ovidsp.ovid.com/ovidweb.cgi?T=JS&PAGE=reference&D=med4&NEWS=N&AN=12217264>
243. Lazovich D, Parker DL, Brosseau LM, Milton FT, Dugan SK, Pan W, Hock L. Effectiveness of a worksite intervention to reduce an occupational exposure: the Minnesota wood dust study. *American Journal of Public Health*. 2002 [cited 2002 Sep];92(9):1498-505. In: Ovid MEDLINE(R) [Internet]. <http://ovidsp.ovid.com/ovidweb.cgi?T=JS&PAGE=reference&D=med4&NEWS=N&AN=12197983>
244. Stroebel RJ, Scheitel SM, Fitz JS, Herman RA, Naessens JM, Scott CG, Zill DA, Muller L. A randomized trial of three diabetes registry implementation strategies in a community internal medicine practice. *Joint Commission Journal on Quality Improvement*. 2002 [cited 2002 Aug];28(8):441-50. In: Ovid MEDLINE(R) [Internet].  
<http://ovidsp.ovid.com/ovidweb.cgi?T=JS&PAGE=reference&D=med4&NEWS=N&AN=12174408>
245. Burgio LD, Stevens A, Burgio KL, Roth DL, Paul P, Gerstle J. Teaching and maintaining behavior management skills in the nursing home. *Gerontologist*. 2002 [cited 2002 Aug];42(4):487-96. In: Ovid MEDLINE(R) [Internet].  
<http://ovidsp.ovid.com/ovidweb.cgi?T=JS&PAGE=reference&D=med4&NEWS=N&AN=12145376>
246. Rollman BL, Hanusa BH, Lowe HJ, Gilbert T, Kapoor WN, Schulberg HC. A randomized trial using computerized decision support to improve treatment of major depression in primary care. *Journal of General Internal Medicine*. 2002 [cited 2002 Jul];17(7):493-503. In: Ovid MEDLINE(R) [Internet].  
<http://ovidsp.ovid.com/ovidweb.cgi?T=JS&PAGE=reference&D=med4&NEWS=N&AN=12133139>
247. You BJ, Jian WW, Sheng RW, Jun Q, Wa WC, Bartizek RD, Biesbrock AR. Caries prevention in Chinese children with sodium fluoride dentifrice delivered through a kindergarten-based oral health program in China. *Journal of Clinical Dentistry*. 2002 [cited 2002];13(4):179-84. In: Ovid MEDLINE(R) [Internet].  
<http://ovidsp.ovid.com/ovidweb.cgi?T=JS&PAGE=reference&D=med4&NEWS=N&AN=12116728>
248. Elferink-Stinkens PM, Brand R, Amelink-Verburg MP, Merkus JM, den Ouden AL, Van Hemel OJ. Randomised clinical trial on the effect of the Dutch obstetric peer review system. *European Journal of Obstetrics, Gynecology, & Reproductive Biology*. 2002 [cited 2002 Apr 10];102(1):21-30. In: Ovid MEDLINE(R) [Internet].  
<http://ovidsp.ovid.com/ovidweb.cgi?T=JS&PAGE=reference&D=med4&NEWS=N&AN=12039085>
249. MacKelvie KJ, McKay HA, Petit MA, Moran O, Khan KM. Bone mineral response to a 7-month randomized controlled, school-based jumping intervention in 121 prepubertal boys: associations with ethnicity and body mass index. *Journal of Bone & Mineral Research*. 2002 [cited 2002 May];17(5):834-44. In: Ovid MEDLINE(R) [Internet].  
<http://ovidsp.ovid.com/ovidweb.cgi?T=JS&PAGE=reference&D=med4&NEWS=N&AN=12009014>
250. King M, Davidson O, Taylor F, Haines A, Sharp D, Turner R. Effectiveness of teaching general practitioners skills in brief cognitive behaviour therapy to treat patients with depression: randomised controlled trial. *BMJ*. 2002 [cited 2002 Apr 20];324(7343):947-50. In: Ovid MEDLINE(R) [Internet].  
<http://ovidsp.ovid.com/ovidweb.cgi?T=JS&PAGE=reference&D=med4&NEWS=N&AN=11964340>
251. Sehgal AR, Leon JB, Siminoff LA, Singer ME, Bunosky LM, Cebul RD. Improving the quality of hemodialysis treatment: a community-based randomized controlled trial to overcome patient-specific barriers. *JAMA*. 2002 [cited 2002 Apr 17];287(15):1961-7. In: Ovid MEDLINE(R) [Internet].  
<http://ovidsp.ovid.com/ovidweb.cgi?T=JS&PAGE=reference&D=med4&NEWS=N&AN=11960538>
252. O'Cathain A, Walters SJ, Nicholl JP, Thomas KJ, Kirkham M. Use of evidence based leaflets to promote informed choice in maternity care: randomised controlled trial in everyday practice. *BMJ*. 2002 [cited 2002 Mar 16];324(7338):643. In: Ovid MEDLINE(R) [Internet]. <http://ovidsp.ovid.com/ovidweb.cgi?T=JS&PAGE=reference&D=med4&NEWS=N&AN=11895822>
253. Chan L, MacLehose RF, Houck PM. Impact of physician reminders on the use of influenza vaccinations: a randomized trial. *Archives of Physical Medicine & Rehabilitation*. 2002 [cited 2002 Mar];83(3):371-5. In: Ovid MEDLINE(R) [Internet].  
<http://ovidsp.ovid.com/ovidweb.cgi?T=JS&PAGE=reference&D=med4&NEWS=N&AN=11887119>
254. Scheel IB, Hagen KB, Herrin J, Oxman AD. A randomized controlled trial of two strategies to implement active sick leave for patients with low back pain. *Spine*. 2002 [cited 2002 Mar 15];27(6):561-6. In: Ovid MEDLINE(R) [Internet].  
<http://ovidsp.ovid.com/ovidweb.cgi?T=JS&PAGE=reference&D=med4&NEWS=N&AN=11884902>
255. McCowan C, Neville RG, Ricketts IW, Warner FC, Hoskins G, Thomas GE. Lessons from a randomized controlled trial designed to evaluate computer decision support software to improve the management of asthma. *Medical Informatics & the Internet in Medicine*. 2001 [cited 2001 Jul-Sep];26(3):191-201. In: Ovid MEDLINE(R) [Internet].  
<http://ovidsp.ovid.com/ovidweb.cgi?T=JS&PAGE=reference&D=med4&NEWS=N&AN=11706929>



256. Mackelvie KJ, McKay HA, Khan KM, Crocker PR. A school-based exercise intervention augments bone mineral accrual in early pubertal girls. *Journal of Pediatrics*. 2001 [cited 2001 Oct];139(4):501-8. In: Ovid MEDLINE(R) [Internet]. <http://ovidsp.ovid.com/ovidweb.cgi?T=JS&PAGE=reference&D=med4&NEWS=N&AN=11598595>
257. Segura JM, Castells X, Casamitjana M, Macia F, Porta M, Katz SJ. A randomized controlled trial comparing three invitation strategies in a breast cancer screening program. *Preventive Medicine*. 2001 [cited 2001 Oct];33(4):325-32. In: Ovid MEDLINE(R) [Internet]. <http://ovidsp.ovid.com/ovidweb.cgi?T=JS&PAGE=reference&D=med4&NEWS=N&AN=11570837>
258. Schoenbaum M, Unutzer J, Sherbourne C, Duan N, Rubenstein LV, Miranda J, Meredith LS, Carney MF, Wells K. Cost-effectiveness of practice-initiated quality improvement for depression: results of a randomized controlled trial. *JAMA*. 2001 [cited 2001 Sep 19];286(11):1325-30. In: Ovid MEDLINE(R) [Internet]. <http://ovidsp.ovid.com/ovidweb.cgi?T=JS&PAGE=reference&D=med4&NEWS=N&AN=11560537>
259. Meyer JC, Summers RS, Moller H. Randomized, controlled trial of prescribing training in a South African province. *Medical Education*. 2001 [cited 2001 Sep];35(9):833-40. In: Ovid MEDLINE(R) [Internet]. <http://ovidsp.ovid.com/ovidweb.cgi?T=JS&PAGE=reference&D=med4&NEWS=N&AN=11555220>
260. Geller AC, Glanz K, Shigaki D, Isnec MR, Sun T, Maddock J. Impact of skin cancer prevention on outdoor aquatics staff: the Pool Cool program in Hawaii and Massachusetts. *Preventive Medicine*. 2001 [cited 2001 Sep];33(3):155-61. In: Ovid MEDLINE(R) [Internet]. <http://ovidsp.ovid.com/ovidweb.cgi?T=JS&PAGE=reference&D=med4&NEWS=N&AN=11522155>
261. Goldberg HI, Deyo RA, Taylor VM, Cheadle AD, Conrad DA, Loeser JD, Heagerty PJ, Diehr P. Can evidence change the rate of back surgery? A randomized trial of community-based education. *Effective Clinical Practice*. 2001 [cited 2001 May-Jun];4(3):95-104. In: Ovid MEDLINE(R) [Internet]. <http://ovidsp.ovid.com/ovidweb.cgi?T=JS&PAGE=reference&D=med4&NEWS=N&AN=11434080>
262. Goodwin MA, Zyzanski SJ, Zronek S, Ruhe M, Weyer SM, Konrad N, Esola D, Stange KC. A clinical trial of tailored office systems for preventive service delivery. The Study to Enhance Prevention by Understanding Practice (STEP-UP). *American Journal of Preventive Medicine*. 2001 [cited 2001 Jul];21(1):20-8. In: Ovid MEDLINE(R) [Internet]. <http://ovidsp.ovid.com/ovidweb.cgi?T=JS&PAGE=reference&D=med4&NEWS=N&AN=11418253>
263. Morrison J, Carroll L, Twaddle S, Cameron I, Grimshaw J, Leyland A, Baillie H, Watt G. Pragmatic randomised controlled trial to evaluate guidelines for the management of infertility across the primary care-secondary care interface. *BMJ*. 2001 [cited 2001 May 26];322(7297):1282-4. In: Ovid MEDLINE(R) [Internet]. <http://ovidsp.ovid.com/ovidweb.cgi?T=JS&PAGE=reference&D=med4&NEWS=N&AN=11375232>
264. Eccles M, Steen N, Grimshaw J, Thomas L, McNamee P, Soutter J, Wilsdon J, Matowe L, Needham G, Gilbert F, Bond S. Effect of audit and feedback, and reminder messages on primary-care radiology referrals: a randomised trial. *Lancet*. 2001 [cited 2001 May 5];357(9266):1406-9. In: Ovid MEDLINE(R) [Internet]. <http://ovidsp.ovid.com/ovidweb.cgi?T=JS&PAGE=reference&D=med4&NEWS=N&AN=11356439>
265. Thompson EA, Eggert LL, Randell BP, Pike KC. Evaluation of indicated suicide risk prevention approaches for potential high school dropouts. *American Journal of Public Health*. 2001 [cited 2001 May];91(5):742-52. In: Ovid MEDLINE(R) [Internet]. <http://ovidsp.ovid.com/ovidweb.cgi?T=JS&PAGE=reference&D=med4&NEWS=N&AN=11344882>
266. Blake SM, Simkin L, Ledsky R, Perkins C, Calabrese JM. Effects of a parent-child communications intervention on young adolescents' risk for early onset of sexual intercourse. *Family Planning Perspectives*. 2001 [cited 2001 Mar-Apr];33(2):52-61. In: Ovid MEDLINE(R) [Internet]. <http://ovidsp.ovid.com/ovidweb.cgi?T=JS&PAGE=reference&D=med4&NEWS=N&AN=11330851>
267. Rost K, Nutting P, Smith J, Werner J, Duan N. Improving depression outcomes in community primary care practice: a randomized trial of the quEST intervention. *Quality Enhancement by Strategic Teaming. Journal of General Internal Medicine*. 2001 [cited 2001 Mar];16(3):143-9. In: Ovid MEDLINE(R) [Internet]. <http://ovidsp.ovid.com/ovidweb.cgi?T=JS&PAGE=reference&D=med4&NEWS=N&AN=11318908>
268. Beresford SA, Thompson B, Feng Z, Christianson A, McLerran D, Patrick DL. Seattle 5 a Day worksite program to increase fruit and vegetable consumption. *Preventive Medicine*. 2001 [cited 2001 Mar];32(3):230-8. In: Ovid MEDLINE(R) [Internet]. <http://ovidsp.ovid.com/ovidweb.cgi?T=JS&PAGE=reference&D=med4&NEWS=N&AN=11277680>
269. Hajek P, West R, Lee A, Foulds J, Owen L, Eiser JR, Main N. Randomized controlled trial of a midwife-delivered brief smoking cessation intervention in pregnancy. *Addiction*. 2001 [cited 2001 Mar];96(3):485-94. In: Ovid MEDLINE(R) [Internet]. <http://ovidsp.ovid.com/ovidweb.cgi?T=JS&PAGE=reference&D=med4&NEWS=N&AN=11255587>
270. Shah S, Peat JK, Mazurski EJ, Wang H, Sindhusake D, Bruce C, Henry RL, Gibson PG. Effect of peer led programme for asthma education in adolescents: cluster randomised controlled trial. *BMJ*. 2001 [cited 2001 Mar 10];322(7286):583-5. In: Ovid MEDLINE(R) [Internet]. <http://ovidsp.ovid.com/ovidweb.cgi?T=JS&PAGE=reference&D=med4&NEWS=N&AN=11238152>
271. Campbell JC, Coben JH, McLoughlin E, Dearwater S, Nah G, Glass N, Lee D, Durborow N. An evaluation of a system-change training model to improve emergency department response to battered women. *Academic Emergency Medicine*. 2001 [cited 2001 Feb];8(2):131-8. In: Ovid MEDLINE(R) [Internet]. <http://ovidsp.ovid.com/ovidweb.cgi?T=JS&PAGE=reference&D=med4&NEWS=N&AN=11157288>

272. Hancock L, Sanson-Fisher R, Perkins J, Corkrey R, Burton R, Reid S. Effect of a community action intervention on cervical cancer screening rates in rural Australian towns: the CART project. *Preventive Medicine*. 2001 [cited 2001 Feb];32(2):109-17. In: Ovid MEDLINE(R) [Internet]. <http://ovidsp.ovid.com/ovidweb.cgi?T=JS&PAGE=reference&D=med4&NEWS=N&AN=11162336>
273. van Wijk MA, van der Lei J, Mosseveld M, Bohnen AM, van Bemmel JH. Assessment of decision support for blood test ordering in primary care. a randomized trial. *Annals of Internal Medicine*. 2001 [cited 2001 Feb 20];134(4):274-81. In: Ovid MEDLINE(R) [Internet]. <http://ovidsp.ovid.com/ovidweb.cgi?T=JS&PAGE=reference&D=med4&NEWS=N&AN=11182837>
274. Steptoe A, Kerry S, Rink E, Hilton S. The impact of behavioral counseling on stage of change in fat intake, physical activity, and cigarette smoking in adults at increased risk of coronary heart disease. *American Journal of Public Health*. 2001 [cited 2001 Feb];91(2):265-9. In: Ovid MEDLINE(R) [Internet]. <http://ovidsp.ovid.com/ovidweb.cgi?T=JS&PAGE=reference&D=med4&NEWS=N&AN=11211636>
275. Figueiras A, Sastre I, Tato F, Rodriguez C, Lado E, Caamano F, Gestal-Otero JJ. One-to-one versus group sessions to improve prescription in primary care: a pragmatic randomized controlled trial. *Medical Care*. 2001 [cited 2001 Feb];39(2):158-67. In: Ovid MEDLINE(R) [Internet]. <http://ovidsp.ovid.com/ovidweb.cgi?T=JS&PAGE=reference&D=med4&NEWS=N&AN=11176553>
276. Goel V, Sawka CA, Thiel EC, Gort EH, O'Connor AM. Randomized trial of a patient decision aid for choice of surgical treatment for breast cancer. *Medical Decision Making*. 2001 [cited 2001 Jan-Feb];21(1):1-6. In: Ovid MEDLINE(R) [Internet]. <http://ovidsp.ovid.com/ovidweb.cgi?T=JS&PAGE=reference&D=med4&NEWS=N&AN=11206942>
277. Hendrickson SG, Becker H. Reducing one source of pediatric head injuries. *Pediatric Nursing*. 2000 [cited 2000 Mar-Apr];26(2):159-62. In: Ovid MEDLINE(R) [Internet]. <http://ovidsp.ovid.com/ovidweb.cgi?T=JS&PAGE=reference&D=med4&NEWS=N&AN=12026269>
278. North Staffordshire Changing Childbirth Research Team. A randomised study of midwifery caseload care and traditional 'shared-care'. *Midwifery*. 2000 [cited 2000 Dec];16(4):295-302. In: Ovid MEDLINE(R) [Internet]. <http://ovidsp.ovid.com/ovidweb.cgi?T=JS&PAGE=reference&D=med4&NEWS=N&AN=11080465>
279. Warner JP, King M, Blizard R, McClenahan Z, Tang S. Patient-held shared care records for individuals with mental illness. Randomised controlled evaluation. *British Journal of Psychiatry*. 2000 [cited 2000 Oct];177:19-24. In: Ovid MEDLINE(R) [Internet]. <http://ovidsp.ovid.com/ovidweb.cgi?T=JS&PAGE=reference&D=med4&NEWS=N&AN=11116772>
280. Thompson RS, Rivara FP, Thompson DC, Barlow WE, Sugg NK, Maiuro RD, Rubanowice DM. Identification and management of domestic violence: a randomized trial. *American Journal of Preventive Medicine*. 2000 [cited 2000 Nov];19(4):253-63. In: Ovid MEDLINE(R) [Internet]. <http://ovidsp.ovid.com/ovidweb.cgi?T=JS&PAGE=reference&D=med4&NEWS=N&AN=11064229>
281. Sauaia A, Ralston D, Schluter WW, Marciniak TA, Havranek EP, Dunn TR. Influencing care in acute myocardial infarction: a randomized trial comparing 2 types of intervention. *American Journal of Medical Quality*. 2000 [cited 2000 Sep-Oct];15(5):197-206. In: Ovid MEDLINE(R) [Internet]. <http://ovidsp.ovid.com/ovidweb.cgi?T=JS&PAGE=reference&D=med4&NEWS=N&AN=11022366>
282. Bowman RJ, Soma OS, Alexander N, Milligan P, Rowley J, Faal H, Foster A, Bailey RL, Johnson GJ. Should trichiasis surgery be offered in the village? A community randomised trial of village vs. health centre-based surgery. *Tropical Medicine & International Health*. 2000 [cited 2000 Aug];5(8):528-33. In: Ovid MEDLINE(R) [Internet]. <http://ovidsp.ovid.com/ovidweb.cgi?T=JS&PAGE=reference&D=med4&NEWS=N&AN=10995093>
283. Ramsay CR, Campbell MK, Cantarovich D, Catto G, Cody J, Daly C, Delcroix C, Edward N, Grimshaw JM, van Hamersvelt HW, Henderson IS, Khan IH, Koene RA, Papadimitrou M, Ritz E, Tsakiris D, MacLeod AM. Evaluation of clinical guidelines for the management of end-stage renal disease in europe: the EU BIOMED 1 study. *Nephrology Dialysis Transplantation*. 2000 [cited 2000 Sep];15(9):1394-8. In: Ovid MEDLINE(R) [Internet]. <http://ovidsp.ovid.com/ovidweb.cgi?T=JS&PAGE=reference&D=med4&NEWS=N&AN=10978397>
284. Furniss L, Burns A, Craig SK, Scobie S, Cooke J, Faragher B. Effects of a pharmacist's medication review in nursing homes. Randomised controlled trial. *British Journal of Psychiatry*. 2000 [cited 2000 Jun];176:63-7. In: Ovid MEDLINE(R) [Internet]. <http://ovidsp.ovid.com/ovidweb.cgi?T=JS&PAGE=reference&D=med4&NEWS=N&AN=10974963>
285. Kidane G, Morrow RH. Teaching mothers to provide home treatment of malaria in Tigray, Ethiopia: a randomised trial. *Lancet*. 2000 [cited 2000 Aug 12];356(9229):550-5. In: Ovid MEDLINE(R) [Internet]. <http://ovidsp.ovid.com/ovidweb.cgi?T=JS&PAGE=reference&D=med4&NEWS=N&AN=10950232>
286. Litrownik AJ, Elder JP, Campbell NR, Ayala GX, Slymen DJ, Parra-Medina D, Zavala FB, Lovato CY. Evaluation of a tobacco and alcohol use prevention program for Hispanic migrant adolescents: promoting the protective factor of parent-child communication. *Preventive Medicine*. 2000 [cited 2000 Aug];31(2 Pt 1):124-33. In: Ovid MEDLINE(R) [Internet]. <http://ovidsp.ovid.com/ovidweb.cgi?T=JS&PAGE=reference&D=med4&NEWS=N&AN=10938212>
287. Stevens V, De Bourdeaudhuij I, Van Oost P. Bullying in Flemish schools: an evaluation of anti-bullying intervention in primary and secondary schools. *British Journal of Educational Psychology*. 2000 [cited 2000 Jun];70 ( Pt 2):195-210. In: Ovid MEDLINE(R) [Internet]. <http://ovidsp.ovid.com/ovidweb.cgi?T=JS&PAGE=reference&D=med4&NEWS=N&AN=10900778>
288. Grossman DC, Cummings P, Koepsell TD, Marshall J, D'Ambrosio L, Thompson RS, Mack C. Firearm safety counseling in primary care pediatrics: a randomized, controlled trial. *Pediatrics*. 2000 [cited 2000 Jul];106(1 Pt 1):22-6. In: Ovid MEDLINE(R) [Internet]. <http://ovidsp.ovid.com/ovidweb.cgi?T=JS&PAGE=reference&D=med4&NEWS=N&AN=10878144>

289. Schinke SP, Tepavac L, Cole KC. Preventing substance use among Native American youth: three-year results. *Addictive Behaviors*. 2000 [cited 2000 May-Jun];25(3):387-97. In: Ovid MEDLINE(R) [Internet]. <http://ovidsp.ovid.com/ovidweb.cgi?T=JS&PAGE=reference&D=med4&NEWS=N&AN=10890292>
290. Luepker RV, Raczynski JM, Osganian S, Goldberg RJ, Finnegan JR Jr, Hedges JR, Goff DC Jr, Eisenberg MS, Zapka JG, Feldman HA, Labarthe DR, McGovern PG, Cornell CE, Proschan MA, Simons-Morton DG. Effect of a community intervention on patient delay and emergency medical service use in acute coronary heart disease: The Rapid Early Action for Coronary Treatment (REACT) Trial. *JAMA*. 2000 [cited 2000 Jul 5];284(1):60-7. In: Ovid MEDLINE(R) [Internet]. <http://ovidsp.ovid.com/ovidweb.cgi?T=JS&PAGE=reference&D=med4&NEWS=N&AN=10872014>
291. Glanz K, Lew RA, Song V, Murakami-Akatsuka L. Skin cancer prevention in outdoor recreation settings: effects of the Hawaii SunSmart Program. *Effective Clinical Practice*. 2000 [cited 2000 Mar-Apr];3(2):53-61. In: Ovid MEDLINE(R) [Internet]. <http://ovidsp.ovid.com/ovidweb.cgi?T=JS&PAGE=reference&D=med4&NEWS=N&AN=10915324>
292. Steinberg M, Cartwright C, Peel N, Williams G. A sustainable programme to prevent falls and near falls in community dwelling older people: results of a randomised trial. *Journal of Epidemiology & Community Health*. 2000 [cited 2000 Mar];54(3):227-32. In: Ovid MEDLINE(R) [Internet]. <http://ovidsp.ovid.com/ovidweb.cgi?T=JS&PAGE=reference&D=med4&NEWS=N&AN=10746118>
293. Roberts L, Jorm L, Patel M, Smith W, Douglas RM, McGilchrist C. Effect of infection control measures on the frequency of diarrheal episodes in child care: a randomized, controlled trial. *Pediatrics*. 2000 [cited 2000 Apr];105(4 Pt 1):743-6. In: Ovid MEDLINE(R) [Internet]. <http://ovidsp.ovid.com/ovidweb.cgi?T=JS&PAGE=reference&D=med4&NEWS=N&AN=10742314>
294. Andersen MR, Yasui Y, Meischke H, Kuniyuki A, Etzioni R, Urban N. The effectiveness of mammography promotion by volunteers in rural communities. *American Journal of Preventive Medicine*. 2000 [cited 2000 Apr];18(3):199-207. In: Ovid MEDLINE(R) [Internet]. <http://ovidsp.ovid.com/ovidweb.cgi?T=JS&PAGE=reference&D=med4&NEWS=N&AN=10722985>
295. Dilraj A, Cutts FT, de Castro JF, Wheeler JG, Brown D, Roth C, Coovadia HM, Bennett JV. Response to different measles vaccine strains given by aerosol and subcutaneous routes to schoolchildren: a randomised trial. *Lancet*. 2000 [cited 2000 Mar 4];355(9206):798-803. In: Ovid MEDLINE(R) [Internet]. <http://ovidsp.ovid.com/ovidweb.cgi?T=JS&PAGE=reference&D=med4&NEWS=N&AN=10711928>
296. Baranowski T, Davis M, Resnicow K, Baranowski J, Doyle C, Lin LS, Smith M, Wang DT. Gimme 5 fruit, juice, and vegetables for fun and health: outcome evaluation. *Health Education & Behavior*. 2000 [cited 2000 Feb];27(1):96-111. In: Ovid MEDLINE(R) [Internet]. <http://ovidsp.ovid.com/ovidweb.cgi?T=JS&PAGE=reference&D=med4&NEWS=N&AN=10709795>
297. Oakeshott P, Kerry S, Hay S, Hay P. Condom promotion in women attending inner city general practices for cervical smears: a randomized controlled trial. *Family Practice*. 2000 [cited 2000 Feb];17(1):56-9. In: Ovid MEDLINE(R) [Internet]. <http://ovidsp.ovid.com/ovidweb.cgi?T=JS&PAGE=reference&D=med4&NEWS=N&AN=10673490>
298. Thompson C, Kinmonth AL, Stevens L, Peveler RC, Stevens A, Ostler KJ, Pickering RM, Baker NG, Henson A, Preece J, Cooper D, Campbell MJ. Effects of a clinical-practice guideline and practice-based education on detection and outcome of depression in primary care: Hampshire Depression Project randomised controlled trial. *Lancet*. 2000 [cited 2000 Jan 15];355(9199):185-91. In: Ovid MEDLINE(R) [Internet]. <http://ovidsp.ovid.com/ovidweb.cgi?T=JS&PAGE=reference&D=med4&NEWS=N&AN=10675118>
299. Mainous AG 3rd, Hueston WJ, Love MM, Evans ME, Finger R. An evaluation of statewide strategies to reduce antibiotic overuse. *Family Medicine*. 2000 [cited 2000 Jan];32(1):22-9. In: Ovid MEDLINE(R) [Internet]. <http://ovidsp.ovid.com/ovidweb.cgi?T=JS&PAGE=reference&D=med4&NEWS=N&AN=10645510>
- 300 Martin P Eccles, Paula M Whitty, Chris Speed, Ian N Steen, Alessandra Vanoli, Gillian C Hawthorne, Jeremy M Grimshaw, Linda J Wood and David McDowell. A pragmatic cluster randomised controlled trial of a Diabetes REcall And Management system: the DREAM trial. *Implementation Science* 2007, 2:6 doi:10.1186/1748-5908-2-6

Received: 18 May 2006

Accepted: 16 February 2007

This article is available from: <http://www.implementationscience.com/content/2/1/6>

© 2007 Eccles et al; licensee BioMed Central Ltd.
